# Supplementary material for: Genome-Wide Identification Analysis of the R2R3-MYB Transcription Factor Family in Cymbidium sinense for Insights into Drought Stress Responses
Source: MDPI journal article supplement (doi:10.3390/ijms24043235), 2023-02-06
Supplement: s1 [file s1]

# Genome-Wide Identification Analysis of the R2R3-MYB Transcription Factor Family in *Cymbidium sinense* for Insights into Drought Stress Responses

Mengjia Zhu <sup>1,2</sup>, Qianqian Wang <sup>2</sup>, Song Tu <sup>2</sup>, Shijie Ke <sup>1,2</sup>, Yuanyang Bi <sup>2</sup>, Sagheer Ahmad <sup>2</sup>, Diyang Zhang <sup>2</sup>, Dingkun Liu <sup>1,2</sup> and Siren Lan <sup>1,2,\*</sup>

<sup>1</sup> College of Forestry, Fujian Agriculture and Forestry University, Fuzhou 350002, China

<sup>2</sup> Key Laboratory of National Forestry and Grassland Administration for Orchid Conservation and Utilization, College of Landscape Architecture and Art, Fujian Agriculture and Forestry University, Fuzhou 350002, China

\* Correspondence: lkzx@fafu.edu.cn; Tel.: +86-139-0690-0395

## SUPPLEMENTARY TABLE LEGENDS

**TABLE S1**| *CsMYBs* protein sequences used in the phylogenetic tree;

**TABLE S2**| Ka/Ks analysis of *CsMYB* genes;

**TABLE S3**| Protein secondary structure prediction of *DrMYBs* and *CsMYBs*;

**TABLE S4a**| Putative *cis*-acting elements identified in the promoter regions of *CsMYB* genes;

**TABLE S4b**| The number of MBS elements in *CsMYBs* and 11 *DrMYBs*;

**TABLE S5a**| Expression profiles of *CsMYB* genes in leaves;

**TABLE S5b**| Expression profiles of *CsMYB* genes in roots;

**TABLE S6a**| The fold-changes of *CsMYB* genes in leaves of *C. sinense* under drought stress treatment;

**TABLE S6b**| The fold-changes of *CsMYB* genes in roots of *C. sinense* under drought stress treatment;

**TABLE S7**| The primers of *CsMYB* genes;

**FIGURE S1**| The 15 motifs of *CsMYBs* and *DrMYBs*;

**FIGURE S2**| The collinearity of *CsMYB* genes in *C. sinensis*;

**FIGURE S3**| RT-qPCR validation of transcriptomic data of nine *CsMYB* genes under drought stress;

**FIGURE S4**| The plant of *C. sinense* under three treatments.

**TABLE S1.** *CsMYBs* protein sequences used in the phylogenetic tree

| Gene ID          | Sequence                                                                                                                                                                                                                                                                                                                                                                                                                                                                                                                                                                    |
|------------------|-----------------------------------------------------------------------------------------------------------------------------------------------------------------------------------------------------------------------------------------------------------------------------------------------------------------------------------------------------------------------------------------------------------------------------------------------------------------------------------------------------------------------------------------------------------------------------|
| <i>Mol004798</i> | MGRAPCCDKANVKKGPWSAEEDSKLKEFIEKLRWLNLYLRPNIKHGEFSDAEDRTICTLFASIGSRWSIIASQLPGRDTDNDIKNHWNTKLKK<br>KLLGISSEKKNSLHHQQQQSQHLLFSSPTPSLFSNPYININATSAPIQIPFLSGFSSHQANLVPISPEGFSASSTSSSSSSCLFQSSQYQVKERGST<br>VLAFGGESSDQGSCTQIRENMSLNNFLVYGNTGFQDFCGLQSSAPLEECLSYGFDEIKQLLMNSNNGIFLEDQTVEGCNSQWKSMS*                                                                                                                                                                                                                                                                               |
| <i>Mol014836</i> | MSREINEGNRIEAPKDQFESSQNDESSCSRSSLAGGTVLKKGHWSPSEDAILVDYVKKKHGEGNWNNAIEKRTELRRCGKSCRLRWANHLKP<br>GLKKGALTREEVEKIDQLHCKLGSKWAKIAAMFCAWLILLEILTASSSGIDSPKFMDALTYKPSHASDTSHTVPNSILLFPDLSHLSEN<br>DSKGHSQAAAVRKQVTRESLARSHAVSNGLLPGRTDNEIKNYWHTRAKRYQRTCLPHYPQHVLRLQALDENQQTLNYSMSNREDKGLGI<br>VLQSAMHDSAKFFKANPGPQAYSLPFSDISFTGLQSQDLVSHTYSFNPGVNHAIQLRETESYFPGNHGSMASGHAMFEQLPHGPNPVNKN<br>VPSFGYSEPGSLIQPNVNFSTSSPPTGTMKLELPSLQYPETDCYSRLAYPPPLPYEAIHTDIQSLPMVVSTQPGYTSQSSGLSETLVQVSHAIST<br>VGKQSSEKSSNYSASPIDILENSSPNMCSADWKGSGDPNSPFSLEVPSPFSECLPIDDISFDDFVDSEATLGEHDLCLK* |
| <i>Mol023318</i> | MLPSIINQPRSMFMDNASIAATSFSISFIVGFAAAGQHGWTGTFEDGWRKGPWTPQEDKLLTEHVKLHGEGRWNCVSRLTGLKRSGKSCRL<br>RWVNYLRPDLKRGKITPHEETIILELHAKWGNR*                                                                                                                                                                                                                                                                                                                                                                                                                                           |
| <i>Mol028264</i> | MFILRQVDGVDLLIESIPHANPFRCRMRLRTCEQKVSVRKGLWSPEEDQKLKNYTAWPWMLELHLSLSCRLRWINYLRPGLKRGIFTSEED<br>IIMSLHAKLGKWSRIAHLPGRTDNEIKNYWNSYLKKKLMQQNHQHPMISSNELNESIQQTSKSENFQLESINQSATSSCSIDNGSFKSSFP<br>RVLFEEWLSPQDMGRDEFDENGLLEEMQSLDMFGEMIGDIDMNYDFIH*                                                                                                                                                                                                                                                                                                                             |
| <i>Mol003923</i> | MGRSPCCDENGLKKGPWTPEEDQILVLYIQKHGHGSWRALPKLAGLNRCGKSCRLRWNTNYLRPDIKRGKFSPEEEQSILHLHSILGNKWS<br>AIATHLPGRTDNEIKNFWNTHLKKKLIQMGMFDPMTNRPRTDFFAALPHLLALANLVDHRPSTWLADGLSAEASKLQCLQYILNAATPTSA<br>DNSMNNLLNSTDQSFSSLDMSNSNQPLFNTHNTEIDVPLSYDQPLMSNENSGFSLFRHGEISTPVSA LPPLTDLSNPGDACSTSSCGGSAAA<br>SFWPDLDDPFMAEFA*                                                                                                                                                                                                                                                             |
| <i>Mol013646</i> | MGRVPCCDKDGLKKGPWTPEEDQKLIDYIQKHGHGTWRTL PKNAGLARCGKSCRLRWANYLRPDIKGRFSFEEEEETIIQLHNILGNKWS<br>AIAARLPGRTDNEIKNYWNTHIRKRLLRNRPDTPAPARSP*                                                                                                                                                                                                                                                                                                                                                                                                                                    |
| <i>Mol018713</i> | MCSRGHWRPAEDEKLKDLVTKYGPHNWNNAIAEKLPGRSKGKSCRLRWFNQLDPRINRSPFTEEEERLLTSHRIHGNRWSVIARLFPGRTD<br>NAVKNHWHVIMARKVRERSRFHGKRPCFSSSLIMGDSSSNAQGKQGSLEPQGFFSLVGNCYKKQQNCFLLGDFRSNSDEFQSWIHGFS<br>GDFSLVGKKNPYFYDFLQVNSDSNGTKCCSSVEDEKDEADQEQSKARPFDFLPVNGSI*                                                                                                                                                                                                                                                                                                                      |

MGRPPCCDKVGVKKGPWTPEEDINLVSYIQEHGPGNWKAIPTNSGLSRCSSKSCRLRWNTNYLRPGIKRGSFTEQEENLIHQLALLGNRWAA  
*Mol017692* IASYLPERTDNDIKNHWNTHMKKKLRMENEGGMIAGSGFSKNQSIKQGWEKRLQTDINMAKQALQEALSMEKPSFLYESKPSSSSSHSS  
 TPPSSTTYASSTENISRLLLENWMRKAPKNSDKSTQHSVKNFVNIGADSTSSDGTITSVANNHIVSPEISQFQVDSKPCLDERFPLSLIETWLFD  
 ENYWGGNGSNNVLDFSFDASHELF\*  
 MCTRGHWRPEEDEKLKELVARLGPHNWNNTIAEMLHGRSGKSCRLRWYNQLDPRINRCPFTEEEERLLASHRIHGNRWSIIARLFPGRTD  
*Mol011788* NAVKNHWHVIMARRSRERSKLQTKQSSLSLESHLVRKEKKEIMNFEFSKGFLFSSLIGGRSRTLCAFKHPISQSQEVHSPNFHEAEGDT  
 SMESSIEFYDFLQVKSDSNETGECSRREDERDQNEKEQQCEAGVPFIDFLAVGS\*  
 MSSDADPMAVDETPPRPPPLENLASSSPPPSSSPSASIECAGPQAEGFGMKSGAASRDRVKGPSPEEDAILSRLVAKFGPRNWSLIARGV  
 PGRSGKSCRLRWCNQLDPQVKRKPFTTEEDRIIIAAHSLHGKNKWAVIARLLEGRTDNAIKNHWNSTLRRKCIEIESCKRAPCEGQEDISADIL  
*Mol016109* EKTGGSSEETQSFGDVKPFTGTEVRDISSRESLSHHSEDRVNTVGPEFKQPPTISRVPRLSAFSPYNPGFSHATSSLQSRSPLNAPHFRACLS  
 GPGDYKLFENMLWEPQVPSRCGHGCCGKTRDQNTSSSLGPEFVEFIEPPPILNREIASMASELSNIWKLKSGLQTGIYSSCQMNPPSSSSCT  
 ASTC\*  
 MVVTREGIRKGPWTEQEDLQLVCFVSLFGERRWDFIAKVSGLNRTGKSCRLRWVNYLHPGLKRGKITPQEERLILDLSQWGNRWSRIAR  
*Mol019840* RLPGRTDNEVKNYWRTHMRKMAQESKRCPLSSSTCSSESEQLDNGMEKNEQRSNMMPKNLEIKEEYEVKVYPMDQIWNDIAATLEP  
 TTTSGLSFESYGHEAGNVSCVSAAMASPVWENCAESLWKMDDELVCVGIKS\*  
 MAFSFSAPQFSTVETQGRRNEAVLILEEQRVKRSSDFEGLSEKNGRIEDQEGIELESGHSLCARGHWRPAEDAKLKDLVAQYGPQNWN  
*Mol022732* LIAEKLEGRSGKSCRLRWFNQLDPRINKKAFTEEEERLLSAHRLYGKAWALISRLFPGRTDNAVKNHWHVIMARRQREQSNAYRRRKPC  
 TSSKIFHKRMEAKCSNNVCSAESTVSSNNHETLCINRSFPVHGFLTRYSPQPPQQFEYLFDTQGELVAGRSGCFERLFDSAIDMRQASPLIV  
 VPGIHHSGFSDSNSEASASDSAINNAFISEEAELESED\*  
 MVRVPCCDKDGLKKGPWTPEEDQKLIDYIQKHGHGTWRTLKPNAGLARGKSCRLRWANYLRPDIKGRGFSFEEETIIQLHNILGNKWS  
*Mol008801* AIAARLPGRTDNEIKNYWNTHIRKRLLRSGIDPVTHQPRDLLNLSSLLNTVLFNQSARLDASKLVDIKPHLNAKFLRIAVSLLQSQYQKQN  
 LLKHNLFQQSHPNCHQTITQPLPSSFLYNPVQFNNAGQWQYNEESSCNLSNLNYENMAQSMTGLLHGAFNAEIPSCQNLVSSLDVLSV  
 SSVTLNNSNISSNIEDEKIPTAATSLISRFLSC\*  
*Mol013522* MAANDVDRIKGPWSPEEDEMLQILVEKHGPRNWSLISKIPGRSGKSCRLRWFNQLSPKVEHRPFTPDEDETIISAHRRFGNKWATIAARLLS  
 GRTDNAIKNHWNSTLERKEAAAAAAVAWTSEERMMGALEDCRPIKRSNGARLCFSPGSPSGCDDTGPTKRNYPQPSSLQVGKVIKADAP

DSTTGKWNPCDPFTFLTSLPGSSCGQNESSDNQKQTDQPQLLEKKPPSVSMASPFSLFLEALQEIIHQEVKNYMSGLEHRGILPPPLPPEEDS  
KLNSVAKGIGISRIN\*

MVRSPSREERGLKKGPWTPEEDQKLIDYIQKQGSHGSRQLPRIAGLNRCGKSCRLRWNTNYLRPDIKRGNFSEEEEEKLIINLHSM LGNKWS  
LISTKLPGRTDNEIKNYWNTHLKKKLLLMGIDPVTHRRRTDLELFANFPKLLSSSTDSCSLINPLMENS LGLQADTVQLARIHLMQVLIQVL  
*Mol001350* LKAASFSSSSSNPNAYSNLVLNNLMSSSLPPLETFSNNSSSSSLPLETSAFGEPSQTPNTNYQDFNVQNSSENISKQLLFHSNTNDLFASSENHS  
VDQKQDQIDLNETSAAKSVNTRYLDTLNLTDLDDTDLWKDVLEPAETLHAKGSGSHCW LISPN TLSLLFCLVHSPCRSLLNRLLLSGGVL  
T\*

MGRSPCCEKVGLKKGPWTPEEDQKLLSYIEEHGHGSRWALPAKAGLQRCGKSCRLRWNTNYLRPDIKRGKFSMQEEQTIIQLHALLGNRW  
*Mol010990* SAIATHLPKRTDNEIKNYWNTHLKKQLAKMGIDPVTHKPKSDALASADGHTRSTANLNHMAQWESARLEAEARLVRESKLRSSAPSPFP  
PQYLPQPPPVSMPTAASPSVDVLGAWQGEWPKPVVNSQAGSHNIDLESPTSTLSFSENMLPSRIPGMGTANDSTNWKCLKKPGFSLDTAE  
AFVNAEATSWLTGSCSGGFAAGFTGMLMGNTNKQNSTEGCDDSDIAGGSCVDVEEGEDEAEENKNYWNSIFNLVNSSSPSNSPPAVF\*

MGRYPCCDEVGVKKGPWTPEEDQKLVEYIKENGHGSWRHLPKSAGLNRCGKSCRLRWNTNYLRPDIKRGKFSEEEERLIHLSVLGNKW  
*Mol001512* SSIATRLPGRTDNEIKNYWNTHLKKKLLFMGIDPVTHRPITNIDLIANLPNLLSHTNLKNLAISCDQSLHQLHTDAAQFARIQIIQSLLHILSSP  
HPTYPADILLQLMNTKLEGLSQLVAGQGLMPNNIEGLKQSSNGFDYQEIASKIMDDISKQGELFSSNTGGGAAAANYSFPSLVSSSPENISV  
DQKQLEQIISSNSSSVAACSSSSTPFDAWDGLHFSDQDAAELGWKDILE\*

MGRSPCCEKAHTNKGAWTKEEDERLITYIKAHGEGCWRS LPKAAGLLRCGKSCRLRWINYLRPDLKRGNFTVEEDELIIKLHSL LGNKWS  
*Mol008437* LIAGQLPGRTDNEIKNHWNTHIKRKLNRGIDTQGTHHPIAKAATAAPSKPTSMSAANTQQSMAEDED AHNWQGLPDLNLELTISLPATS  
QMPVASRDNSTQSTCLCYSLGFPSISLACSCNMLQS\*

MLDDGRPSGVRIISDDGGDRRDAGYYGAAGKRRGVASKQPETRPRQGRLQRWSAKDRDLAAWRDRHGYRRGCWVNQQQSRSLHPPPP  
LFP SERD GKTNETAFPLEQQQQPSLIGWGLEGFSGGSGSYGSEKNGQSEEHDGEHESGQSKLCARGHWRPAEDAKLRELVAQYGPQNWN  
*Mol014848* LIAENLEGRSGKSCRLRWFNQLDPRINKTAFTEEEERLLSAHRLYG NKWAL IARFFPGRTDNAVKNHWHV IARKHRELSNSHRRRKASS  
SISSSAQAFDKNLQVNCYNNACIVESTISR NIDESFSTCTDLSLNSYAYRSFPGDFFTRHIHEKQPQQFQYLTGSDEKAVTGRYGYSQRPFD  
SENDFRQVSPLVFVPGTYQSGYSDSNPEASATGSVVKKGN AFIVEEGDNDREKISLPFIDFLGVRAT\*

MGRPPCCDKIGVKKGPWTPEEDIILVSYIQEHGPGNWRSVPTNTGLSRC SKSCRLRWNTNYLRPGIKRGNFTDQEEKLIH LQALLGNRWAAI  
*Mol018189* ASYLPERTDNDIKNYWNTHLKKKLIRKLEIDVETEGESSLKR GASISNYQSVTKGQWERRLQTDINMAKQALQEALSMEKPSFLYEIKPSCS

SHSSNNSRSPSSTYASSTENISRLQLQNWMRKPPNSSSSSDRSNSAESTQISVTANSSTSVGKTVSFGNDKRSSIVSPETCSLQVESKPSLEPEL  
HFSQLETWLFDENYVGGTESSMNMLDLALDESELF\*

MGRSPCCDEVGVKKGPWTPEEDEKLVEHIKKHGHGSWRHLPRNAGLNRCGKSCRLRWNYLRPDIKRGKFSEEEEGLIHLHSM LGNKW  
SLISTKLPGRTDNEIKNHWNTHLKKKLLIMGIDPVTHRRRADLEFLANLPNLLSSSNNSCNRM TNSWGSALQLQAADAANLAQVQILQGLLQ  
Mol010343 VLIASSNSNSSSSNLNM TNLGSSLAPLRNIADILQVSRQLEALQNGSFGLAHGSLPATTQMPNNYQTLPHQDQPEVNGNENQNLLFHSNAP  
SLVSASPENTPSVSLKQEHINSNEISAANSESSTPFPDWDALSLSDPNGADLGWKEILE\*

MSITPVEKFVMEKSERNPYAMKADTELRFYQRYDDLLISSGDTSFINTSEISSSTVEAKRGKSSSSSWAVSSVLT SRTSVRGQWTAEDNL  
LVKL VKEHGVKWSQISKKL VGRIGKQCRERWLNHLRPGIKETWTEEEEISLIETHKELGNRWAEISKKIPGRSENSIKNHWNATKRRLSSK  
Mol001031 RKG GIRKTSKGKTSLLQEYIIKTTELLNNSTSPKQQLPTTQTKVSDNLNCEHYFNGSIEDQIDFIDTSLPQFNELFEKEGNGSNGEFCSDV  
YLTHHMDEVPAPEFVNLHGENLKDFLGDDMDLECKKDMDL MEMILTCSSQEYPYNYFGRSSSDSLT\*

MTPSVELKEEPAVTPPETSAAVAGTAEASQSLKKGPWTAAEDAILIEYVKKHGEGNWN AVQKNIGLQRCGKSCRLRWANHLRPNLKKGS  
FSPEEEALILQLHAQLGNKWARMAAHLPGRTDNEIKNYWNTRIKRRQAGLPLYPPEIQYQLALMNQKQGNLMLHQNQIRPKNFMSHISP  
Mol012137 TTTTLFNHSGTSNNNTNYLLGNSNLNPPPHQLQSSTFSVKTELPSTQLFSCCAGDQKLLPPPVP LTIGEGNNVLFDDLYRESQSGELFNEGL  
FFEPLSINCITTAESMPPQLPPPSNSKHSIIDPPYKLENSDITIGMQVMKQPIETMVSQDVCNQP KMNMFHTTMMPAEKLLSDWCELSPSAGV  
TEDDIRVEMQQLASTLSMNNDWNFELSSWQNMPDIR\*

MGRSPCCDKAHTNKGAWTKEEDQRLVSYIQAHGEGCWRS LPAAGLLRCGKSCRLRWNYLRPDLKRGNFTEEEDELI IKLHTFLGNKW  
Mol003893 SLIAGRLPGRTDNEIKNYWNTHIKRLLSRGIDTQTHHPITATSAAFLSSPEIYSAVPESA VTS DHKCHSGSSSGGSGNCADLNLELSISLPY  
YSSPQSPYSDDASTAAAVRTPETCFCYRLGFRGGEACVCESLKEQVVSGLAMSD\*

MDGGGGGEEKIKGSWSPEEDALLMKLVERHGARNWTLISAGIQGRSGKSCRLRWCNQLSPEVHHRPFTAAEDAIIVA AHGKYGNKWATI  
Mol017415 ARLLPGRTDNAIKNHWNSTLRRRRRVEAATVSALSGPESES DSGGKRPCRRDDLILKVVEPMT PDAVDPATSLSLSPGESSAAVAASAAT  
APDAGTGGGWKEKGWLGNACVMSVMRKMI AEVRRYMSGLRLDGGGGFY SIVKAESASNGQD\*

MGRVPCCDKNGLKKGPWTPEEDQKLIDYIQKHGHGTWRTL PQNAGLLRCGKSCRLRWANYLRPDIKGRFSFEEEEAIQLHSILGNKWS  
Mol008800 AIAARLPGRTDNEIKNYWNTNIRKRLLRSGIDPVTHRPRDLLNLSLLSTVLF TQPSRLDALKLLDNKPQLNTEFLRIAANLLMSQCQHEN  
LFEHNQVQESQPTYHQ TIPQQLSASLLYNPVEFSNTSQWQYNEASSCSLSDNLVTINNDLRYEASTVELPSDQNLYS DLDVSLSTPVSSMTM  
NDSSTAFNNSIEEEKDSYHNDFDFQISDMLDINEFI\*

*Mol004182* MGHHS CCNQQKV KRWLSPEEDEKLIK YVTTHGYGCWSEVPDKAGLQRCGKSCRLRWINYLRPDIRRGFRSPEEEKLIISLHAVVGNRW  
 AHIASHLPGRTDNEIKNYWNSWIKKKIRKPNTGTCSSSSPQCSSVQILPTLIPGFNSLNQFEPLANQTLTNSKPNDNSNPIFPSSPIPLFMFDSEC  
 GGTVAKEDHELLLDVGNLNLVDVWNTNDNQNDHQVLSPLSTFVDQNYLPPLVDSMVAMVPPPGCIGEECEASGSQECFEKNELSEWVEA  
 QQYPGFFIWDQTVQGQLGGDELPVSTPPTSNTDASVDSFPSTL\*  
 MGRSPCCEKAHTNKGAWTKEEDERLVAYIKVHGEGCWRSPLPKAAGLLRCGKSCRLRWINYLRPDLKRGNFTEEEDELI IKLHSL LGNKW  
*Mol009531* SLIAGRLQGRTDNEIKNYWNTHIRRKLLSRGIDPATHRPLQGPGDVSFVKADEKGASLIRKEDEQKSNNSSSSNSNSRSSSDEPKRWRCPDL  
 NLELGISPPSHQEEDSEEDLMREELGLCFRNGLLLEFR\*  
 MSSLQQRSEAPVLLLSSLWPQASFLTASESPSEREFVRSKESWSFN TSHDDLRLSDESMESRDLETKQSKLCSRGHWRPTEDAKLKDLVAQ  
*Mol009191* LGPQNWNLIAQNLKGRSGKSCRLRWFNQLDPRINRKAF TSEEEERLLSVHHHYGNKWSLIARFFPGRTDNAVKNHWHVIMARKQREHSIS  
 YRRRLSSSTS FNPSPHLQTM EHNSSSGESTITNTREESISSATTRTVHGLVLSPHQKKAINFIMGAKSIGDQITSSDSTSKASAREAVVFSGSE  
 LDRERINPPFFDFLGVGA AEEKPLPVCVMPRERERES\*  
 MGRSPCCEKAHTNKGAWTKEEDERLTAHIKAHGEGCWRSPLPKAAGLLRCGKSCRLRWINYLRPDLKRGNFTEEEDELI IKLHSL LGNKWS  
*Mol004081* LIAARLPGRTDNEIKNYWNTHIRRKLMSSGIDPATHRPLNEQQEKT TISFIKGEEKVEEFEGREEGKKSSSNSSEEMSAWIRRRPEEENKQW  
 RCPDLNLELCMSPPSLKQQALCQEPVKSEELSLCFNCRLGVNKSSDCKCGSGFLGLRSGVLDYRRLETN\*  
 MGLKKGPWTPEEDRILVSYIQRYGHGNWRALPKQAGLSRCGKSCRLRW TNYL RPDVKRGDFSKEEEETIIY LHAMLGNRWSAIAAKLPG  
*Mol013321* RTDNEIKNVWH THLKKRLNPNQAMKDSKRGNRNSAMNKEMKKKDMEDQVSPACSRSEASSFVIATENC DVWWKEDSMDFLKELPELD  
 EILTSDAQ SASQNNWAGEEEEEEDSTGKNYDRTRSSNEEDIRFWMNLLAEAGNLECFK\*  
 MGRSPCCEKAHTNKGAWTKEEDERLIAHIRAHGEGSWRSPLPKAAGLLRCGKSCRLRWINYLRPDLKRGNF TDEDELI IKLHSL LGNKWS  
*Mol019958* LIAGRLPGRTDNEIKNYWNTHIRRKLLNRGIDPATHRPISAASTSNLSISFSSSSSVTDKRNGVSRVSALLPRCPDLNLDLCISPPLEEQLQQDL  
 LEESNCGGEFLRLGSSFLDYRSLEMK\*  
 MGRPPCCEKEGVKKGPWTPEEDIILVSYIQEHGPGNWRAVPTNTGLMRC SKSCRLRW TNYL RPGIKRGNF TDQEEKLI IHLQALLGNRWA  
*Mol005176* AIASYLPERTDNDIKNYWNTHLKKKLKKLQLSGEDGGGRTVNPISNNHHQSFSKGQWERRLQTDI HMAKQALSEALSLDTMNLRSPPS  
 LGPANACTYASSTENISRLL ENWMKSTPKSRSTSLGSM SNVCS DTTMESTTPAGQIMTSSAVQLGFRPAKIEPNGVLKEESKESSVVA  
 PPPLSFIENWLFDDL SVGN GGDH QDLVDLPLSDASELFQD\*  
*Mol017976* MGHHC SRQKV KRWLSPEEDEKL VRYITTHGHGCWSSVPKQAGLQRCGKSCRLRWINYLRPDLKRGSFTEQEERVIIDVHRILGNRWA  
 QIAKHLPGRTDNEVKNFWNSCIKKKLIAQGLDPKTHNLIPNTRPPYINSTSNIPHFPQNTCIPFTISSNIKETDSGRMMPLQTSSDALALHDSV

AISTFQYEDPDVMMMSFKEHNSHEYNISASSSSLDHANILQISPNQPDFMDDHCCLWASSTPLEEAILADESKQNGERQGGQQGEVQSLGDKV  
 DQFNEAMINGDASFDLELMESELMPCGSVFCSDNSMEQLQWEC\*  
 METEKQNAIVEVDLRRGPWTVEEDLILTNYSKHGEGRWNTLAKCAGLKRTGKSCRLRWLNLYLRPDVRRGNITVEEQLLILELHSRWGNR  
*Mol015419* WSKIAQHLPGRDTDNEIKNFWRTRMQKHANQQCMPPLLERIRTVVDSSRAVMGVHTASASSSGRNGFSSSSATSNYDDHLDLKDMASTLE  
 EEGWPEFPAHGCEGSMGLGFWEFSAMGPNMYA\*  
*Mol026352* MAASEEMRKGPWTEQEDAQLVCYVHLFGERRWDFIAKVSGWRCGGGSRSLCFTGLNRTGKSCRLRWLNLYLHPGLKHGRMTPQEEQLIV  
 ELHSRWGNRWSRIARRLPGRDTDNEIKNYWRTHKRKKAQERQSSLLSPSSSSSSSSSSSLNSIVMPDAKKA\*  
*Mol015023* MVRAPCCEKMGLKKGPWTAEDQILISYIHNHGHGNWRALPKLAGLLRCGKSCRLRWNTNYLRPDIKRGNFTREEEDTIALHQMLGNKW  
 SAIAAKLPGRDTDNEIKNVWHTLKKRLKKTDTETTQEPKRKTQIESNEETTTHSYSSIDVSCSGATESSTSTVENSQNSMESLNHEFEEIDE  
 SFWTEILQMESNGDYNSIDSMATEEFSSDFMDETSLLSAGSRDEDDMNFWLRFVLQAEELPEI\*  
*Mol007990* MEIEVHGGATPHSEEEMELRRGPWTLEEDLVLNMYISSHGEGRWNSLARCAGLKRTGKSCRLRWLNLYLRPDVRRGNITPEEQLLILELHS  
 RWGNRWSKIAQHLPGRDTDNEIKNYWRTRVQKHAKHLQCDVDSKQFKDVMRYLWMPRLIERIRAASGNSNAAQSVAGYGTLPGDDHTF  
 GAATGWGGHGEIVKPRPESPATTVSSSGAGGYEVTEKPKDGEGIQVNVQPHISGGLWPEASLPTPGYAHQGIPELEQYWGLGGDISDNLW  
 SMDDIWYLQQ\*  
*Mol008698* MGRSPCCEKAHTNKGAWTKEEDERLIA YIRANGEGCWRS LPKAASLLRCGKSCRLRWINYL RPD LKRGNFTEEEDELI IKLHSL LGNKWS  
 LIAARLPGRDTDNEIKNYWNTHIKRKLISRGTDPATHRPLHEAQANNTISFFKGENKIVEFVKREDERNKSSSSSSCCSSNSSEKLLIWRSEED  
 DDEKMKWRCPDNLNLELSISPPFEKKEDLCDYNVLNGEALIGLCFSCKLGVKNSSECKCGGVFLGLSRGVLDYRSLETN\*  
*Mol010269* MGRGRAPCCQKVGLNKGSWTVEEDQRLISYINKNGHENWRALPKLAGLLRCGKSCRLRWINYL RPD I KRGNFTKEEEDI IINLHELLGNK  
 WSKIAAHLPGRTDNEIKNVWNTHLKKRLNLKNFTPPSPTSMTKLHDDSLSPTSSSTTSISLSHETNSYSIDEETPFLDEIDNIIDPHLDMWDIF  
 DDISISTSPVMTITNDPNNTLDITMKECKQWLADLEEELGLYIDSVDDGDEIKGSEGEDLVRNYFHRGPSSPSSIRASRS\*  
*Mol010337* MGRGRAPCCEKVGLNRGAWTPEEDMRLIA YIRKYGHGNWRALPKQAGLLRCGKSCRLRWINYL RPD I KRGNFSAEEEEETIIKLHGL LGNK  
 WSKIASSLPGRDTDNEIKNVWNTHLKKRLKSNEQSSSPTPIVSTTNPEDTQSSSSFSSTTSISIEHKCSHPCQDHSTDIPLLPNLDALDALDV  
 DIEPKITDLADDLKDSIDEIIGIDIEPEVWNDVVFTEECHEAEKRRWLAYLEELGLFDDNVLASMMTRWWRWLWWVKGP\*  
*Mol028471* MGGSDTNEVLEEDNNRADAEEENVNDCTGQSNLCVRGHWRPEEDCKLKALVSIYGPQNWNLIAENLEGRSGKSCRLRWFNQLDPTINRS  
 AFTEEEEEKLMAAHRLYGNKWAMIARLPGRTDNAVKNHWHVIMARKYREQSTAYRRRKLNQAMDRRSEEIIPNHPFSFSSSIADCSTYL  
 HLLPNDGKNSSLSHAGSYTREKLDFLSGQNPSNGDKTKNFITRTWKGKGIMKP\*

MRLRTCEEQKVSVRKGLWSPEEDQKLKNYMLQYGHGCWSSIPAQAGLQRNGKSCRLRWINYLRPGLKRGIFTSEEEEIIMSLHAKLGNK  
*Mol011449* WSRIAAHLPGRTDNEIKNYWNSYLKKKLMQQNHQHPMISSNELNESIQQTSKSENFQLESINQSATSSCSIDNGSFKSSFPRVLFEEWLSPQ  
DMGRDEFDENGLEEMQSLDMFGEMIGDIDMNYDFIH\*  
MRRERACLPKEELRRGAWTEHEDKLLSDYITSHGLGRWRSLEKAGLNRCGKSCRLRWLNLYLRPGIKRGNITDEEEELIIRLHKLVGNRWS  
*Mol012178* LIAGRIPGRTDNEIKNYWNSYIKKKVAMDVSESHSYSKAATTTTAAAATTTASTTQLSFKSPCSEKANEASSVTSMVKSPTYEAEDLNTNS  
AVLHEQHSSMKPEGHQQVCLPPSASSDFDSGFESFGELSNSSVFSCYGWRDAKSMACSSVIGEDCSSRRMEER\*  
MGHHSCCNKQKVRRLWSPEEDDKLIKYISTYGHGCWSSVPRRAGLQRCGKSCRLRWINYLRPDLKRGFSFSPYEETLIHELHRILGNRWAQ  
*Mol006542* IAKHLTGRTDNEVKNFVNSTIKKKLISQAVEGLSIPNLSNQFPLHPQDLVPISFFQFHISHFQDQSQPYNFPNLAQMYNPQTPQHNNMENPT  
VPHFLQLSSSYGPVWPFYQQEQQPHQTYNHEPAMLFDEINELQFFTKSKGSLLDKKVEIAIDNQLVVTDLFCFSSLSSMPYLESSHGYNSL  
MEYMHVLTGSDSLAEVTTEDHNSNDTFIQPYLLP\*  
MVLRSRKKLKKKFRSLLAESVADELKDSRKDALSAEVENHELQIVRELLVSKSRPKLLKRGNRGNKKPLDDSKNGDGSCAARQGSVE  
NEGSIDLKDKGDKKRKRVEDGVLEEEGFKKEEQKLEKKKKDKQKKKKQREMKLKKKGKEEVEGKEETINVEIENMNGVSKIPEVVP  
VQVDESESKKVYVGGIPYSSSEDDIRSFFEDCGTVTEVDCMAFPETGKFRGAILSFKKTQGKIPPLSISSSSDPADPSIASQAVSDVRPASLL  
*Mol021224* QPLTRSSVGLPDPEFHRCQFGLGSRLRTPDPWTRAVHHCFMPSDLRAVIHGISERLRTQDDLFRPEGAACKRALALDGSDMGFFLKTQ  
PYKANRNQKSDFAPEIIDGYNRVYVGNLSWDISEDDLKQFFSDCKIASIRFGTDKETGDFKGYAHSKASSIVSSIHTKDKTRTLMVAMKEG  
TRKGPWTEQEDLQLVCCVSLFGDRRWDFIARISGLKRTGKSCRLRWVNYLHPGLKQGRMTPEEEHLILELHSGWGNKWSQIAGKLPGR  
DNEIKNYWRTHMRKMAQEMKRNSQHSSSSSSSTSSSCLSLKTSTNGMENQQEVSFLLTMPEEKRR\*  
MGRSPCCEKAHTNKGAWTKEEDQRLIAYIGAYGEGSWRSLPTSAGLLRCGKSCRLRWINYLRPDLKRGNFTEEEDELIKLHGLFGNKWS  
*Mol000543* LIASRLPGRTDNEIKNYWNTRIKRLLDHGIDPQTHRPINSATRPVVLVNPTADLFATTVITKLDERSHSEGSSSASCTIDLNLDSIVSLPHSS  
VDDTPLTHSVTTSTMTTKMAATPAICLCYSLGFRGSEECGCQAVQEQQAVIRYCSSIEMELRNYFS\*  
MDLGSNLLILGESDLVFLVLGDLQGELDLEGIGGGGDSGVRERESLSIKILTLCFNTWIEGKQERTQVMGRGRAPCCQKIGLHKGSWTPQE  
*Mol001517* DIRLISYIRKHGHGNWRALPKQAGLLRCGKSCRLRWINYLRPDIKRGNFTEKEEDTIKLGSLGNKWSKIASCLPGRTDNEIKNVWNTHLK  
KRLRHNNHPTQSPTNMAARPEVDAPSSSSSGTAVTEGEELSFNKIEPIEPQLDMWDILDSSSPNLSPLSPPPVEDDDILDIPDPDLWSDD  
TNIDSKTKEVDNSVGGKSADESKNWLAYLEELGLFDEVETKETVELISMQVGESMGSYFHKRPSSSSSTSLTTLVDLTVVMHSPWSN\*



MEGQYGWGTFEDGWRKGPWTPQEDKLLTEHVKLHGEGRWNCVSRLTGLKRSKGKSCRLRWVNYLRPDLKRGKITPHEETIILELHAKWG  
*Mol006174* NRWSTIARSLPGRDTDNEIKNYWRTHFKKEKTMKNIERARANFLKQQQEKKQQQHQQLQLEVPQFEEIAITQLMQEIAMCNMPSVVFQDE  
EFTSKSMVSSDDRLGDGEAYYATSENLWNLDDLGLDMGDQALPFYY\*  
MVRAPCCERVGLNKGQWTPQEDKILITYIQTYGHGNWRALPEKAGLLRCGKSCRLRWNTYLNPGIKRGNFTKEEEDTIINLQQILGNRWS  
*Mol020712* AIAAMPLPGRDTDNEIKNVWHTHLKKRLNPNQILQNSKRKIERRDNRSNSVIEFSSTSASESCSDFSSPTTESSSNVSERDNSNSRNDDESTCDNG  
VEEIEESFWTEILFVNGCDSPLMEVDSSKNEDLSFWLRIFMEAETLQGFPEI\*  
MDMRRGPWTMEEDLILMNYIAMHGEGRWNSLARCAGLKRTGKSCRLRWLNLYLRPDIRRGNITPEEQFLILELQSRWGNRWSKIAQQPLG  
*Mol002558* RTDNEIKNYWRTRVQKHAKQLQCDVNSKQFQDVMRYIWMPLMERISVASGELPAAECMNLTQTDQTIGCKQCETGPEISGCTGSCSEST  
GSIGTTSTEFKGPECDRLSGSSGTHNHDVCWPEAAPQNPTGYAYEQELPELDQYWGGEEYENMWSMEDIWQLTQ\*  
MVDESSNADKRIHINQEAQVRKGPWTMEEDLILINYIANHGEGVWNNLARSAGLKRTGKSCRLRWLNLYLRPDVRRGNITPEEQLLIMELH  
*Mol012057* ARWGNRWSKIAQRLPGRDTDNEIKNYWRTRIQQKVKNGDAPDYSSQMIIDEASTSHTSSIEEGMAQQSYPIHPNTNPEAYPPSCNSGELGEN  
FWSMEDFWPIQSDQSLNGD\*  
MVSHSCCLKQKLKGLWSPEEDEKLFNHIIRFGVGCWSSVPKRAGLQRCGKSCRLRWINYLRPDLKRGSFSSQEEEDLIISLHEILGNRWSQI  
*Mol014116* ATHLPGRDTDNEIKNFWNSCLKKKLRQNGIDPSTHKPLNEEQNEDKSHNLNDSNQMNAMRPVFDPPALDFQPGTVLNTYDQLQQPPLIP  
ASDSLNASENYFYGESSASCINWNCSIGAELNFSSDSSYYYSSFQMKSSVFQNPDAACLDIPQSEFGDDL\*  
MGRPPCCDKAGIKKGPWTPEEDIILVSYIQEHGPGNWRLVPTNSGLMRCGKSCRLRWNTYLRPGIKRGNFSSHEEEIIIQLQALLGNRWAAI  
*Mol006363* ASYLPQRTDNDIKNYWNTHLKKKIKKYQASVGSYITSSDSAGSTSHERVLGGYGADIRNSCSSNSHTLTHSSSTYASSAENISRLLEGWM  
RSSPNQTLNDKKLQHQMKKESITFNSNSFIMNQLNFDVEVNSQLPLEGSVIAWDKTATDSVFEENKQFKMMTYDDNKLKTQSQQPAMSV  
LEKWLLEENPGQMDAFLETMF\*  
MERQRKRM TLGDEV MVLLRVAHNMTCSENDGDTLMLLKEQLESSTDEGSCCGSSTTGGRVTLKKGPWTTAEDALLISYVRKHGEGN  
WNAVQRHSGLLRCGKSCRLRWANHLRPHLKKGAFSPEEEQFIIQMHSKMGNRWARMAALLPGRDTDNEIKNYWNTRVKRRSRAGLPLYP  
PKLSLQTSNENQLIQSASELSSGNHQNIGVLQGTMTNGTLEFRCHPHKANSGLPSPPRFPDIPVTDLPCHGLGYYTRSFLNSGANHFKQTWE  
*Mol017152* SETFSPGCHVNQNSIMVPAFEELPSNSETVYLNLTGLGYPPDPDENKNLASFICSTPGNPGNFSSRLLPGAVKMELPSLQYPEADYIDWTSS  
SLLKSSYDAVDMYIQSPENVSVHSDCASPRNKGLEDLVQESHAISSGKKQSFEEKSFDRVAAVMASGTVKWEEIRDPTSPFCLSAVSLFN  
DCNPTIISTFDESSACETPMGDKQDKYTPNLPHYFLRPVLLGSGWLMGNSGDAEDSIAGALDENLHKERAPVPIPVAGISSMASLEAYPWTN  
MPRVCQMSEH\*

MGRSPCCSKVGLHRGPWTAREDALLTSYVQNHGEGNWRSPLKLAGLLRCGKSCRLRWMNYLRPDIKRGNIGPEEEDLIIRLHRLLGNRW  
*Mol016709* SLIAGRLPGRDNEIKNYWNSHLSKKLKKQGLKLREATPRTKQSNSSSNKKQSTKIINQSETLGGTNETKIYAPKPTRLTSRIHVMENSSEE  
EKGSSDEMELSANYLSDGGEHDFLNTNQYLDLGFQFLPLQQDSVMFERLYDEYSQLLQSEVNDVNLFAVDQYLMV\*  
MERNSCCFKEGINKGAWSSDDKLLTAFVNAHGEGKWTTVPSKAGLKRSKGKSCRLRWLNCLRPNVKRGNFSEEDDLIIRLHKLLGNRW  
*Mol023305* SLIAGRLPGRDNEIKNYWSTTSLKKASFRHLIRQSSATKRPPASNREIPTKQSAEESTAKMVDEMPENSKGGCIVKEQQFQVEENMALNFG  
SFDDDTMVALRDQTLMEFNGPMDFENWMLNDEYVDYLPDADQIQSLPSLFDIGGEF\*  
MVRAPCCEAMGLKKGPWTHEEDNILVSYILTNGHGNWRALPKKAGLLRCGKSCRLRWNTNYLRPDVKRGDFSKEEEETIIMHAMLGNR  
*Mol011069* WSAIAAKLPGRDNEIKNFWHTHLKKRLNPSQFIKTKPRATANPDEPKEEDKFEDQISPVFIQNESYFSENITESNSVDMKQNSIDSFEEYFH  
DFDEILWSEEFVTGEEEDGSIGLNFQPSLSNEDSISFWLNLAESEGNLE\*  
MMGDQEEPNSVDKMINNSNEEAEEVVRKGPWTMEEDLILMNYIAIHGEGFWSNLARSAGLKRTGKSCRLRWLNLYLRPDVRRGNITPEEQL  
*Mol010957* LIMDLHSRWGNRWSKIARQLPGRDNEIKNYWRTRIQQKVKDGETVNCSSQMMKYEGSSSHTGGLEEIIAQTSYPIYPNANPQEAYVPTYS  
ESNPNETYLSAEDFWSIQSFNGL\*  
MEVQYGWGTFEDGWRKGPWTPEEDKLLTEHVKLHGEGRWNCVSRLTGLKRSKGKSCRLRWVNYLRPDLKRGKITPHEETIILELHAKWG  
*Mol023320* NRWSTIARSLGRDNEIKNYWRTHFKKESTTKNIKRARAKFLKQQQHQQQLQLEVPQFEEIAITQLMEIAYMCNMPYVFQGEETFTRKSMV  
SSDNRLGDGEAYYATWENLWNLDDLGLDMGDQAVFYY\*  
MGRAPCCDKANVKRGPWSPEEDEALRSYIQNHGSGGNWIALPKKAGLKRCGKSCRLRWLNLYLRPDIKHGCFTKEEDDIIFTLYSKIGSRW  
*Mol007569* SVIASKLPGRDNDVKNHWNTKLKKRMMETQARLSGSHYRSSAPPLMASEPLALTDHSLASINCASIRPTDQIESQSFNGSFDEPLDLRVPR  
QNPSFLDLDFGSITDLLCSSTYEETIETIWADASEEIKLGELSQSVAYLY\*  
MGRAPCCAQGLKKGPWTPEEDKILVDYIQSNHGSGWCSLPLKLAGLLRCGKSCRLRWNTNYLRPDIKRGPFPTSEEQKTIQLHGIVGNKWST  
*Mol016869* IASQLPGRDNEIKNYWNTHLKKRLLRMGINPDYAPASPSSSAGGGGAGFPVTRHMAQWESARLEAEARLSRESLLFSSASSAAAVSAA  
DSEPADDSLPAARKPESDFFLRIWNSEIGDAFRKPLPSTLPRSAAEEATTAPTEESKSCASAGGEAPSAPDSSSSNELDETSRRTSST\*  
MGRHSCCHKQKLKGLWSPEEDEKLLKHITKYGHGCWSSVPKLAGLQRCGKSCRLRWNYLRPDLKRGTFSSQREENLIIEHLHVLGNRW  
SQIAAQLPGRDNEIKNLWNSCIKKLRQRGIDPNTHKSLSETENPDENKVSTSSERNILYTGDSLKQTVPQLTSSLMQSVDKNSIPVKEFC  
*Mol018126* IDNATTCLRSSSNSISSFPLPQLNYGTSATASLPLSSNPFLWFNQNCRVFDMNPESLCTSMSTMGPSISSSVLTNSIDLKSPVNLSSSCLPPTCT  
GAPIFSYLDAGNPSRCSSGSSSSSSFFDSGFLSWPDLTTEKEIQINFQGDPEELKWSEYLQGNFPVSSVLHSHNQPLYGGDANSESHFDIEGV  
GLWHQNQQPQHQQHQQPQQQASDLYGKEYQRISTLFGQI\*

*Mol000176* MGRAPCCDKANVKKGPWSPEEDAKLKSYIEKHGTGGNWIALPQKIGMKRCGKSCRLRWLNLYLRPNLKHGGFSEEDNIICSLYVTVGSR  
 WSLIASHLPGRTDNDIKNHWNTRLKKKLLGKSRKDHQHHSRRIPKQLEPQKSEETNDFYWLDPALPPYPETDSQASIKKVLMLKGGRISID  
 EEAEIPPLINAPDHNSIYCSSNTSLMASSAQLSSFNECLSTNLNDIFASNEVKLEEFDNYSLYGMTTMAEEITGLLGMPEAVNWSTSDVSSSI  
 YSPMASTSVSYHGSMQQYVYQDHQMHLGMELSFKEYE\*  
 MKFYKRMGRHSCCYKQKLRKGLWSPEEDEKLLHEHITKYGHGCWSSVPKLAGLQRCGKSCRLRWINYLRPDLKRGTFSQEEENLIHELHGV  
 LGNRWSQIAAQLPGRTDNEIKNLWNSCIKKKLRQRGIDPNTHKPLAEIDEQREKIAEIDSSGHPTPEPAKQTEQPAETAVLNNFVRPANSSA  
*Mol002856* ASYYSLPNLTYSDECGNNIGLIQQFWFNQSSKFFNTINPNSEFSFNSVSSLLPSVPRSTLSTSKELKPLTNLLMENSPPSGFYWEAGNSSNSSAS  
 SGSNDPLFDGSIFPWTQLMPERDTNIQLHGETEDLKWSEYLNGLSIPLSTDLSQNPCLNGVKVEEQFGIDGLSIWLQNHQQQQQQQQQQQ  
 QASNFYGKDCQKDMVC\*  
 MGRAPCCEKVGLKKGRWTAEDQLLVKYIKTNGEGSWRSLPKKAGLLRCGKSCRLRWINYLRDLKRGNISKEEEDTIIQLRANLGNRW  
*Mol008979* SVIAGHLPGRTDNEIKNYWNSHLSKKVEGLHDKEDENC DATGVTKVRKRKGGRPSKSAKKKKAEAVISSMDEGTKLKDVMEASKSEQGE  
 SIVTDLEPQELSLEDLPSIEILLVDEENIEGGRALNPNNEEEGKQKEDSGVIVEVLSNEEGGSSFDEIEKLVDWELEELALRLWEEGEGVGEV  
 TPWVWEDESPRINGEFGDFDYEFDAFKEDDYLLDDWLLSDASECSSFSSCG\*  
 MVRAPCCDKKGLKKGRWTVEEDETLMNIAENGEGSWRSLPKNAGLLRCGKSCRLRWINYLRSDLKRGSSISKEEDEIIKLHATIGNRWS  
*Mol008232* VIAAQLPGRTDNEIKNYWNSHLSRRVHCFRRHGESKTFIYDIGSIPSPGKRRGGRTSRAAMMKNSSSSMVSGSIREQISPNPNQNQVLNHT  
 NNNLCISSSSSALTEKENSSTLTFDFDFDLEEVLPNGDIDAVSLEANEMGESRRATCSGEKEVELAMEEESGTMMTEMEKMLKWDFESLEA  
 KLWEEDGSDMWPWLWDISGDIIFDEEPLGSWLLA\*  
 MGRAPCCDKENVKKGPWSPEEDVKLKSYIEQYGTGGNWIALPQKVGLKRCGKSCRLRWLNLYLRPNLKHGAFSEEDNIICSLYIRIGSRW  
*Mol019578* SLIAAQLPGRTDNDIKNYWNTKLKKKLLGKSSHKNHHQSQYTRRAPKQDPNNLQEIINTVEISNGSTSSASYWIQPATPTYMSSSTEIKRFLP  
 KLEGVPLITPDHSDLNDTNSYLLEASPQSSFTNCLSSSSTELDDIFGHFDSFYGSNGMSGEITGLLSMPDQVFNSLMYPPMAVSAKASYQG  
 TIGANGGLV\*  
 MGRAPCCSKVGLHRGPWTSREDALLTSYIKNHGAGSWKSLPKRAGLLRCGKSCRLRWNYIRPDIKRGNISPEEEDLIIRLHSLGGRWSL  
*Mol000639* IAGRLPGRTDNEIKNYWNGHLSKKLRNQGFAMRAAVSRPKPSRDHSSMKKTNNTTTEMKSTSEKATVSKIYAPKPTRIERRYRYNVMAS  
 VTESNEETEGSDGRLDSGESSSEN YQENISCSDNGEEANLLDVNRYLGLDLDSENGDFFLQDHEVVERVYQEYLQLLN VETEKEKQII\*  
*Mol011408* MGRAPCCSKVGLHRGPWTAREDSLLISYIQNHGEGNWRSLPKKAGLLRCGKSCRLRWNYLRPDIKRGNIGPQEEDLIIRLHCLLGNRWS  
 LIAGRLPGRTDNEIKNYWNSHLSKKLKKQGFAIREETPRPKRTATPNYHNKKKNNNNNSKLSETMQSDGAVENAKIYAPKPTRFKPTWSV

MEKSESVTEEYEKGSSDASSGTNYDVDLASWSHDDHGGEFDQTAVGFHDATHLDFAADFFMQDESLQRLYDEYSQLLQLEVGANQLAEP  
LMQ\*

*Mol005657* MGIRPPCCDKLNVKKGLWTAEDAKLLAYVSTHGSGNWTNVPKKAGLKRCGKSCRLRWNTNYLRPNLKHEGFSSQEDELIVTLHATIGSR  
WSIIANQLPGRTDNDVKNYWNTKLSKKLALNGIDPVTHRPISEIKHSITTLHFAAATAAGQPLPSAATVGVGHHSRLISINRDLKKILLSP  
PIPPPLEPATPPVLWNASGQTAAAPRSFPPPPPPPPQDLEWVQFLAEDAFLCIDEHDAYRAPPFATVDADDFMEEEEADVSSFIDEMLDRDR  
EIIEFSGLVGCHYAL\*

*Mol020055* MMRRPETTNAASSKNGATVHKLRLKGLWSPEEDDKLMTYMMTNGQGCWTDVARNAGLQRCGKSCRLRWINYLRPDLKRGAFSIEEEELI  
IHLHSILGNRWSQIAARLPGRTDNEIKNFWNSTIKRLKNSSQSPSPSHDQKSPDANKELIMEDIMFMRMNSSSSSSSSSMQAFSMNTINYN  
LFPFPDTVANDCFINDMSSSLAHDHGMYNNDGNAHGIIAMDGGLKVEEGYDHFFVPPLDSASQEENGANLDYAYQNYSRNIGEINSNMMTL  
KDHD DTKNIKGSHFAGSHEKWEEGQESMRVGEWSLEDLIEDVSSFPLLD FQVE\*

*Mol001669* MAWKKDSSKLNLSKSTPTLPLLRPQNLSFLKWFPSP LTLPLTQLTTSFPSRQTLMRMKFWGKHNMVVAEEEEISRDGGGENTNDSSGQSK  
LCARGHWRPAEDSKLKLVAIYGPQNWNLIAEKLEGRSVFYRKSCRLRWFNQLDPRINRS AFTEEEEEKLMAAHRLYG NKWAMIARLFP  
GRTDNAVKNHWHVIMARKYREQSTAYRRRKLSQTMHLRKAIHFRSSRKTFADHRDQERTDIFRQNDNEVQALQSSSYSHQASILLTMHQ  
SAGHLPHNISVASSSSGETPAHSAEVEVNRMDASHGHIERSSSSSPTDFLG SYLRE\*

*Mol006740* MGRPPCCDKPGIKKGPWTPEEDLILISYIQEHGPGNWRSPINTDMTAASNVIAGLLRCSKSCRLRWNTNYLRPGIKRGSFTPYEEGIIHLQA  
LLGNKWAAIASYLPQRTDNDIKNYWNTHLKKKLIK LQETIGSHNPLAIEAATVNTEFAGVQLQQQHPQYSSCTYASSTDNISRLLEGWMRS  
SEKNTMQSSSIDIKNSGDSLICHEEFYHEKLPEMMPVTAEAVVEVEQNRSLTFLEKWLFDDGTGHVDGFMELPSDQLI\*

*Mol000510* MPEEDEKLREMVTRHGHFNWNAIAEKRRGRSGKSCGLRWFNQLDARIKRNTFKEEDEERLLSYHRIHGNRWAVIARLLPGRTDNAVKNH  
WHVIMARRSRETSEVLKLNQFIRSEEKQRREDLEIKFSEDIFCPNLRGGDETKSYGYNSIFQGGQH QFFSCYPNVHIFEDGIKEESSIEFYDFL  
QVNSSDSNATGKR SKMDEEEQEEHDKEKLESKGGVPFIDFLVDSSHDWST\*

*Mol001948* MGRQPCCDKVGLKKGPWTTEEDKKLINFILNNGQCCWRAVPKLAGLLRCGKSCRLRWNTNYLRPDLKRGLLSESEEKLVIDLHSQLGNRW  
SKIAANLPGRTDNEIKNHWNTHIKKKLRKMGIDPLTHKPLPSEDQLPHQTQHCEIPYAVSDLSTAVPLHRPLDSLEAFCTDDVPLMEPHEIIL  
PFTPSTTPCSSSSTTERTAWPSSSSSSSSSVKAEIIFPSMEWSESIYLWGMNDFMGWDFISHEGDGKLSSTD LFNQNQEPWK FELF\*

*Mol002260* MGRQPCCDKLVKKGPWTAEDKKLVAFILNNGHCCWRAVPKLAGLLRCGKSCRLRWNTNYLRPDLKRGLLTDAEEKIVIDLHASLGNR  
WSKIASKLPGRTDNEIKNHWNTHIKKKLLKMGIDPVTHKLLNDQTSSTAMASP NSTVTDDEKFSKKHEPLDAEKVIINTVSQEESTNPQQN  
CSNAIDRDEQVIGCLWDDDMPFIDKLWSSPISNEAWERSSEWLLDYQEF GIGDLELGRVESIGFADEQIKLN\*

Mol023319 MTIIQDNShQHMFQDASMPQHASTDGVILVPTPITALASQAISLYNRSHLDGWRKGPWTPQEDKLLTEHVKLHGEGRWNCVSRLTGLKRS  
 GKSCRLRWVNYLRPDLKRGKITPHEETIILELHAKWGNRWSIARSLPGRTDNEIKNYWRTHFKKGKKTNIERARAKFLKQQHQHQQLELE  
 VPQFEEIAITQWEIAYMCNMPYVFQGEETFTRKSIVSSDDIDWVMRHMPLGRIWNLDDLGLDMGDQASFLLELDGIGVKKTV\*  
 Mol013852 MSTGKKKQSPSIIELVFLSLCMSIARAPCCDKANVKKGPWSPEEDAKLKSYIDEHGTGGNWIALPHKIGLKRCGKSCRLRWLNYLRPNIKH  
 GGFSEEDQIICNLFVSIGSRWSIIAAQLPGRTDNDIKNYWNTRLKKKLLGRRRESSSTSQHRHLSDDKDCNTKPNPNGSTQILTASALERLQ  
 LHMQIQGLHCPFSFYNNSTSLWPKLYPLKNDCKIFQPLSTDATATSVHPLKLSQQAMEPIEQANISNSMHPNIQGSLGASSSSSSNLDIELHDL  
 LYGKESKLFSEIDSFNDLNIEEGTGWLGRNGFEEKSSSSSWDSAFALHPDSVLQEYGLGYDL\*  
 Mol001734 MGRAPCCDKAIVKKGPWSPEEDAKLKAYIEHGTGNNWIALPQKIGLKRCGKSCRLRWLNYLRPNIKHGGFSEEDRIICSLYVSIGSRWSI  
 IAAQLPGRTDNDIKNYWNTRLKKKLLGRRRDLPPSQFSQLAPADQKLNDEGSNPNPNNESSQNLTTSIAIERLKLHIQLQGLHSPFSYGNASL  
 WPNKLLQTLNSTDHSIATAASPLKHFQQTNICNSMISNMQEHIVIPSSSCNLEAELHNLLDGYKENYQFTQVDCLKEIMNDIDQKGFDWW  
 ESNEFVEKLSSTSWDSALQPDTVFIQDDELGYDQ\*  
 Mol006579 MRPPTVVKKERASTTAVASGGAAAAPQQLKKGPWTAEDAILKEYVRKHGEGNWALQKKSGLQRCGKSCRLRWVNHFRPNLKKES  
 FSPEEETLIIRLHAQFGNKWAHMAKHLRGRTDNEIKNYWNTRVKQRKAGLPLYPPEIQQHISSRCHGQVQNAPWTANSPTLKLPLQPTNS  
 SFTSAMPLSENPHYGSILQDPSRGKNISFQFPFLTSPVLNWPENFDLGPPLLVLKEELPSSQFSSNYGDEQMPHCNSGLLNDLLPESHGEEKLL  
 SSTYLAIIDLGLGYWDCPLGIKVIEEMLETDGRALIDMILTEMAMATPKTFVPDLYNCSGSSGSSGEFSNCPSSVTTDEEIELDMPQLEWS  
 YVHGTGGF\*  
 Mol005587 MGRKPCCDKEGVKRGLWTIEEDQRLVDFILNNGIQCWRFVPKLAGLMRCGKSCRLRWVNYLRPDLKRGALSEAEQIIQLHSNLGNRWS  
 KIASHLPGRTDNEIKNIWNTRIKKKLKLQQLDQITNNIEVERENHISKVEDKGLELEISTGSSKSSLFLELEQNWVQEKNIQANVSISSSAS  
 ASMDGNLNTSYWEGESNLHGGSNQLLWADTTDYFSSWDAYNCVDDFLRYENYP\*  
 Mol016137 MEARKRDEFSSKRSWSSEDEILLKYIESHGLRNWNIIGKNSGLSRDGKSCRLRWLNLKPKGLKKKLKPFSSKEEFIIFSKHAALGNKWSKIA  
 KQLPGRTDNEIKNFINTHMKKCLKTGTIPIYPREISMKYAQGTGYGLPIASSDIADSVFQQWTELVDLPSIQNTEEDGKDIFLSSYLQNSQSSF  
 ESLTQPQLAAPQQALITGFSTVLSSEQCSNLSISALLYSDYSMNTDLYSLLSKFI\*  
 Mol002877 MHSGGSGRKELPETAAAIRKGPWMAEEDVLMDFVKKHGRDWSSIRSKGLLPRTGKSCRLRWVNLKPKDLKTSKCKFSAEERIVIDL  
 QARFGNKWARIATCLPGRTDNDVKNFWSTRQKRLARLLQTALPMSIKPFDDDDHQAMIPFLQPIVTSALLPYTLPCPDLPFTEQYSNGQ  
 CSHVPYIEDPDSAKTLHMLNLDATAALLIEPAIANSEICLQSSTPPQPPFDHSLLELPLLPEGQDFIPEFGDMNFPGHFGCAENSHAMQLHMAP  
 TFFDVVDVGANDIKIEQPGTPESFFGDFPADMFDSLQPPPS\*

MEGQYYGWTITDGWRKGPWTPQEDQLLIEHVKLHGEGRWNSVSWLTDEQILWSGLKRSGKSSRLRWVNYLRPDLKRKGITAKEEAAIL  
*Mol017655* ELHARWGNRWSMIARSLPGRTDNEIKNYWRTHFKKSTKNVEKARARYLRLQQDQKQQLLSRSNIMKEETSSQTQMAMMPKEMEEMTF  
 LCNNMPLMLHEGGSSSENQQPAVKIERAKRKLTTTHGGAFGI\*  
 MLGGVVRGLGFDCGACHVLLPVVLRFAFVWHLFLPFGLISSSLLGLVYSRNAVSGGFYIFMSVKIMLGLTFRFLNMCSVEKDGDTKMPP  
 EEQPDSSSNDEGSWSGSPTS GEGIALKKGPWTSTEDAMLIDFVKKHGEKNWNAVQRNTGLPRCGKSCRLRWANHLRPDLKKGPLTREEE  
 QFIIQMHA KIGNKWARMAALSVSFCNRNSYLSQCVTQLPGRTDNEIKNFWNTRTKRRQRAGLPSYPSNDDCSGASNENLLIQNASKLCHG  
*Mol016758* DISSGVLQGSYEMPRFPCTRPM SYAPLSDIHRTYMLSQELRPYTRCFLNQGANHTKR NIESEACLPGYHGS LGSVVSTFTELPSEHSESMY  
 QNLGLGYSYDPDPDNKNLISFGCSIPGSHGSSHENLSASRCSSGTVKLELPSLQCPETNYSNWTAPPYHVDVPSPPENAPFLPDRA SPRRNG  
 LEALVHESKTMNCGKKQSSEKSSCSAITLSDMMESTAVNLCTEEWEETS DQMSPFSQSVTERAPITSNSFDEFHPKDPLGSEATMAVEEAS  
 ATSLPDKEPSHWPDFLRPDALLESNWILTDSHRVKETS DTSFELLGEDLCTAMVSLDSCPWN SMP SVCQIPEYL\*  
 MAANDVDRIKGPWSPEEDEMLQMLVEHWSLISK SIPGRSGKSCRLRWFNQLSPKVEHRPFTPDEDETIISAHRRFGNKWAT IARLLSALITP  
*Mol028701* LSHWNSTLERKEAAAAAAWTSEERMMGLWRIAGRSSGRMAPGSVSARVGKVIKADAPDSTTGKWNPCDPFTFLTLSLPGSSCGQNESS  
 DNQKQTD PQLEKKPPSVSMAS PFSLEFLEALQEIIHQEVKNYMSGLEHRGILPPPLPEEDSKLNSAKGIGISRIN\*  
 MGRAPCCDKANVKRGPWSPEEDAALRSYVERHGTGGNWISLPQKAGQLTYACILSLFLFFKALNDAAKAAAFANYLRPDIKHGGFTEEE  
*Mol001134* DNIIFCLYKTIGSRWSV IASHLHGRTDNDVKNYWNTKLMKKIMAAGETINSPISNNQNTNKFHQPSPLHHHQFKFRDWIQLVSTERRSS  
 LTLQSSQWTTSSITVDDGGEGVTKPLPSSRSLVSPPGQLLGFVTS GTYESPTSLWANTDTKPQGVYQSLYS\*  
 MGRIPCCEKDNV KRGQWTPEEDNKLSSYIAQHGT RNWRLIPKNAGALLDRWSLIAAQLSGRTDNDVKNHWNTKLKKKLSGMGIDPVT  
*Mol012110* HKPFSHLMAEIATTLAPPQVAHLAE AALGCFKDEMLHLLTKRRIDFSSTYAVGVYPTPVPPPHSGEPNLVSDINGEETIQIKMGLSRAVMQ  
 EPNPVKGWGSTANGEPDNHNL MCEMYPMAIDQGYMYGDPSAYVNDGEGSTWSTCNGGGGGSAAAQQHETGSRGYLLKGEEDDAE ESE  
 GVKGGSKEDAGVFGSECVLWDLSEDLMNHIV\*  
 MGRAPCCDKASVKKGPWSPEEDERLKS YIEKHGTGGNWIALPHKIGNFYFYAGLFMILIWSIIAAHLPGRTDNDIKNHWNTKLKTRLLGK  
*Mol014101* QRKNQQRNRSCNLKQVMKKNKADNDQSASATTEANKAWLNLP ISTITFHSTDHAS YDNQSQTSISK LQMKLADVRLPCCGNGPHQVQVA  
 PSLRIPQAIYETPLNTMAYSSHENTLNDGSPLKNVGPEYFEQGFNYSNNSLMKLEGDFDFFYGMSSFINESINVSESITWSEMNSFTTSVLPIS  
 STSEETLDFTSWETVKQC\*

MGRAPCCDNMGVRRGPWTPEEDQILISHIQRYGHGNWRAIPKQAAGKLPGRTDNEIKNLWHGHLKKRFDPNQNMKEAKQKNRGNSKAK  
*Mol018336* EFKQATLEENVSSACSTTNDRISSSVISTVGGENNSKTNMNYQLLQFDDSLCCFEPQSITKNCSLKLIFITDDFNPMFSFYNGEGSNFWMNM  
 LGKAANLQDWQNM\*

MGLERPWTPEEDQILISHIQRYGHGNWRAIPKQAGLVRCGKSCRLRWENHLRPGIKRGNFTKEEMDAVISLHAVLSSRHVFFSLHYCQWS  
*Mol018337* AIAGKLPGRTDNEIKNLWHGHLKKRFDPNQNMKDAKQKNRGNSKAKEFKQATLEENVSSACSTTNDRDMSSSVISTVGGENNSKTNMN  
 YQLLQFDDSLCCFEPQSITKNCSLNEIFITDDFNPMFSFYNGEGSNFWMNMLGKAANLQDWQNM\*

MHSGSSGGGVRCRSELQSTETAAAIRKGPWMAEEDAVLIEYVKRYGPRDWSSIRSKGLLPRTGKSCRLRWLNKLRPDLKSGCKFSAEEE  
*Mol013317* WVVIDLQARFGNKWARIATYLPGRTDNDVKNFWSTRQKRLARLLQTPLPVGSRRNQGKVPMPPEAPMFEPNCNSGDLPLYNDPQCLDLIPF  
 TAECANSKCIHPPFVEEPDAMKMVLMSSLDLPLSLLKPAITDRELCLPSSSSSAPQSPFDHSLPDLPLLEGGQGLILEFGEMSSPGQFCCAESS  
 QVMQLPPSSLLDLQFGDHGVKIEHPATPESFFGDFPADMFEMDQPPVS\*

MTLVSVQLKEKPAVKPPETSAAVTGTTTEAPQSLKKGHWTAEDAILKRYVEKYGEGNWNNAVQKNLGLQRCGKSCRLRWANHLRPNLKK  
*Mol012133* GAFSPREEALIVQLHAQLGNKWARMALQVLGLLL\*

MAARCRDVDRIKGPWSPEEDEMLQILVVKHGARNWSLISKSIPIGRSGKSCRLRWCNQLSPTVEHRPFTPEEDRTIISAHQRFGNKWATIA  
*Mol021537* LLNGRTDNAIKNHWNSTLKRKYSGAALEDEGRSLKRSNSAGLSFSPGSPSSSDVSDSSHHSQPLMTPPPMVAPVYRVPVPTGCIVPSQLPHA  
 IDTDSSGTGSITISDPITSLTSLPGSASDQSEASDHHLRQNSDLLLLALPTKPEKLPLPAAAFPFSSNEFLVVMQEMIRQEVRYNLGMEQR  
 ETMIMSPSHESLCNTVIKRIGISKID\*

MGRLRVREEEPSEAKRVICAALWRPLYVEKDQSLVMQKPMQGEAFPDQVYYYQIEGGRADMDCASVNGGKSIETSSSSSVMESSIGA  
*Mol011587* VRGQWTAEEDRMLIRLVKQHGIRKWSQIARIFTGRIGKQCRERWHNHLRPDIKKDSWTEDEEILLVQAHKEIGNRWAEIAKRIPGRSENSIK  
 NHWNATKRKQSSKKRLRKMAFHGDTSTPKHTVLQGYIKSITSSLHEITPITSPSASHSRTSNEFQMKLLKVPQPHDSKLASQMVEELLSVEK  
 QEMRAFEKEEQDFLGCSIDIEYVSQFLNTEEESEFSPSSNVTSAGFEAQSGSGGSHLQWDFYLANLLNRPSLPAIGFEFGSSNAEMVTCVDGQA  
 SPIRSVGEMDLMEIYNWHLSHLPR\*

MDGGSNEPFPSPFKQMAQKPSWGFGTVLSEEMETKEHGRLNSKLCVRGHWRAEDAKLKLVARYPQNWNLIAEKLDGRSGKSCRLRW  
*Mol003679* FNQLDPRINRKAFTEEEERLLSAHKFYGNKWALISRLFPGRTDNAVKNQWHVMMARRQRELSACKRRKSSSSCFITSVKMEEKININSN  
 SSNECTSSRNHLSMFLNSYKFPGTSLIGFDGKPEASAAETVVAHEREKMSLPFIDFLGVGAT\*

MAADKPEESKLCPRGHWPRGEDDKLRQLVQEFQPQNWNSIAEKLQGRSGKSCRLRWFNQLDPRINRRPFTEVEEEERLLAAHRFHGNKWA  
*Mol015625* LIARLFPGRTDNAVKNHWHVIMARRQREKTKFLIDKSSFQQNHS SHILNQQTCCSISPNQFNHYKYNYGILQSSHQPLQMFSNSSNIYWRF  
GMLDGHMGCCRTVSGGVNQEEKDNDEALRSKNVVYIDFLGVGKD\*  
MENLDAVKHGEMKACPRGHWPREDEKLRQLVEEFGPQNWNTISEKLQGRSGKSCRLRWFNQLNPRINRRPFTEEEEEESLLTAHKIHGNK  
*Mol023861* WALIARLFPGRTDNAVKNHWHVIMARRQREKAKFLCKNGPSSTWPAFSNFSLTSERRVNYGILESSRFLNVPLLSFCDAYPACSLSGTGGS  
GMIRNMNEVLRLGCNSRREILSINCRGGIQFLEEGNDEASWRREDLTYIDFLGVGKDC\*  
MSSDHAAAPAPAPAPSTQAKKDRHMSWTQEEDDLLRAQVALHGSDNWTIVAAQFKDKTGRQCRRRWLTYNTECKKGGWSQEEDML  
LCEAQKIFGNRWTEIAKVVTGRTDNAVKNRFSTLRKKRAKHHVTSDENNNNSCLHPSNKKIMIEPSANKQQNRYGDSSYVNSHESLTTSTH  
*Mol017683* DITGTQSRPPLAVLTKNFNNLSCVQAHCHLDSNTKLTACDKMHHLPLKQLQIVRSRAISLEGMIQNYCFATRELLSSLAVKACSEN RNQSS  
EDAWKSYMIWTREGGSLSSFSEMDFLLDNFEGVFEDFQCGDTEIQLSTRVVDLENSQTSSEISTGCTHDDPRNNVDKHQLNHCSVGCNEGE  
SHQHEGISAPVKFVCQGGTMSPSLELTQNRENLLVSSKSEFDSPLKTIPPFHSFTEEIPSPFEFSSSVSFDL\*  
MKERQRWRAEEDAILRAYVKQYGPREWNLVSQRMNVGLERDAKSCLERWKNYLKPGIKKGSLTEEEQRLVIHLQSKHGNKWKKIAAEV  
*Mol011807* PGRTAKRLGKWWEVFKEKQQRELKESNKISSTPIEPGKYDRILESFAEKLVKQRPVTPLLMASPLLPPWLASSNNTSSPSVALSLSPSTLTAA  
PPTPWVQIERGVPENTLGLVNAQQNVTNSQQNLLGELVECCREIEEGRKEKIEEIESKVRELREEQKLALERIEAECWEQLLVVRRDAESKE  
QKLAELWSAKHAALSKLIRQMTGHH\*  
MGLSLASPPSLFCSFENNGRINESGVLLEQQDGFFCGGKGSFVVEKNIHNMELEKRENETRLSKLCSRGHWRPAEDAKLRKLVALYGPQN  
*Mol006728* WNIIEKLDGRSGKSCRLRWFNQLDPRINRNAFTKEEEQKLLSAHKFYGNKWALIARLLP\*  
MDREWRKGKGAAWTREEDAKLTEAHDKRNWTVISSEIPGRSVAACRQRWINHLKPAIEHPPFTDEENAIIVGANQEQRKKWERIARL  
*Mol009335* LPGRTANAIYHWKMNLCHLRNAPGSSQQAENL\*

---



**TABLE S2.** Ka/Ks analysis of *CsMYB* genes

| Subgroups | Gene pairs       |                  | Ka   | Ks   | Ka/Ks | Divergence time (mya) | Purify selection |
|-----------|------------------|------------------|------|------|-------|-----------------------|------------------|
| S1        | <i>Mol017692</i> | <i>Mol005176</i> | 0.27 | 1.77 | 0.15  | 97.35                 | Yes              |
| S1        | <i>Mol018189</i> | <i>Mol017692</i> | 0.16 | 1.46 | 0.11  | 80.19                 | Yes              |
| S2        | <i>Mol018337</i> | <i>Mol018336</i> | 0.02 | 0.02 | 0.82  | 1.30                  | Yes              |
| S2        | <i>Mol011069</i> | <i>Mol018337</i> | 0.43 | 1.06 | 0.40  | 58.51                 | Yes              |
| S2        | <i>Mol020712</i> | <i>Mol015023</i> | 0.29 | 1.18 | 0.24  | 64.61                 | Yes              |
| S3        | <i>Mol010269</i> | <i>Mol010337</i> | 0.35 | 1.91 | 0.18  | 104.97                | Yes              |
| S4        | <i>Mol003893</i> | <i>Mol008437</i> | 0.26 | NaN  | NaN   | /                     | /                |
| S4        | <i>Mol008698</i> | <i>Mol009531</i> | 0.18 | 1.35 | 0.14  | 73.96                 | Yes              |
| S4        | <i>Mol008437</i> | <i>Mol000543</i> | 0.26 | 2.03 | 0.13  | 111.32                | Yes              |
| S4        | <i>Mol004081</i> | <i>Mol019958</i> | 0.22 | 1.92 | 0.11  | 105.70                | Yes              |
| S5        | <i>Mol023305</i> | <i>Mol012178</i> | 0.49 | NaN  | NaN   | /                     | /                |
| S6        | <i>Mol011449</i> | <i>Mol028264</i> | 0.04 | 0.05 | 0.66  | 3.00                  | Yes              |
| S10       | <i>Mol010343</i> | <i>Mol001350</i> | 0.24 | 0.97 | 0.25  | 53.36                 | Yes              |
| S11       | <i>Mol013646</i> | <i>Mol008801</i> | 0.05 | 0.13 | 0.37  | 7.08                  | Yes              |
| S11       | <i>Mol008801</i> | <i>Mol008800</i> | 0.16 | 0.53 | 0.30  | 29.17                 | Yes              |
| S13       | <i>Mol002856</i> | <i>Mol018126</i> | 0.34 | 3.26 | 0.10  | 178.98                | Yes              |
| S14       | <i>Mol013852</i> | <i>Mol001734</i> | 0.19 | 1.01 | 0.18  | 55.54                 | Yes              |
| S14       | <i>Mol019578</i> | <i>Mol000176</i> | 0.24 | 1.48 | 0.16  | 81.28                 | Yes              |
| S17       | <i>Mol023320</i> | <i>Mol023319</i> | 0.11 | 0.09 | 1.15  | 5.17                  | No               |
| S17       | <i>Mol021224</i> | <i>Mol019840</i> | 0.23 | 0.96 | 0.24  | 52.84                 | Yes              |
| S17       | <i>Mol023319</i> | <i>Mol017655</i> | 0.24 | 1.15 | 0.21  | 63.16                 | Yes              |
| S18       | <i>Mol012133</i> | <i>Mol006579</i> | 0.23 | NaN  | NaN   | /                     | /                |
| S18       | <i>Mol017152</i> | <i>Mol016758</i> | 0.35 | 0.86 | 0.41  | 47.26                 | Yes              |
| S18       | <i>Mol012137</i> | <i>Mol012133</i> | 0.12 | 0.37 | 0.31  | 20.40                 | Yes              |

|     |                  |                  |      |      |      |        |     |
|-----|------------------|------------------|------|------|------|--------|-----|
| S19 | <i>Mol010957</i> | <i>Mol012057</i> | 0.16 | 1.06 | 0.15 | 58.45  | Yes |
| S20 | <i>Mol002558</i> | <i>Mol007990</i> | 0.22 | 1.22 | 0.18 | 67.16  | Yes |
| S21 | <i>Mol003679</i> | <i>Mol022732</i> | 0.32 | 0.98 | 0.32 | 53.86  | Yes |
| S21 | <i>Mol011788</i> | <i>Mol000510</i> | 0.28 | 1.09 | 0.26 | 59.85  | Yes |
| S21 | <i>Mol028471</i> | <i>Mol001669</i> | 0.28 | 1.16 | 0.24 | 63.88  | Yes |
| S21 | <i>Mol000510</i> | <i>Mol018713</i> | 0.36 | 2.11 | 0.17 | 115.89 | Yes |
| S21 | <i>Mol023861</i> | <i>Mol015625</i> | 0.22 | 1.70 | 0.13 | 93.44  | Yes |
| S22 | <i>Mol028701</i> | <i>Mol013522</i> | 0.06 | 0.12 | 0.55 | 6.42   | Yes |
| S22 | <i>Mol013522</i> | <i>Mol021537</i> | 0.26 | 1.31 | 0.20 | 72.23  | Yes |
|     | <i>Mol002877</i> | <i>Mol013317</i> | 0.20 | 0.70 | 0.29 | 38.70  | Yes |
|     | <i>Mol016709</i> | <i>Mol000639</i> | 0.32 | 1.22 | 0.26 | 66.77  | Yes |
|     | <i>Mol010990</i> | <i>Mol016869</i> | 0.45 | NaN  | NaN  | /      | /   |

---

**TABLE S3.** Protein secondary structure prediction of *DrMYBs* and *CsMYBs*.

| Subgroups | Gene ID          | Alpha helix (%) | Extended strand (%) | Beta turn (%) | Random coil (%) |
|-----------|------------------|-----------------|---------------------|---------------|-----------------|
| S1        | <i>AtMYB96</i>   | 29.26           | 5.4                 | 2.56          | 62.78           |
| S1        | <i>Mol005176</i> | 29.39           | 6.07                | 2.88          | 61.66           |
| S1        | <i>Mol017692</i> | 32.33           | 4.67                | 3.33          | 59.67           |
| S1        | <i>Mol018189</i> | 35.03           | 6.05                | 4.14          | 54.78           |
| S1        | <i>OsMYB60</i>   | 36.98           | 6.43                | 2.89          | 53.7            |
| S1        | <i>AtMYB60</i>   | 39.64           | 5.71                | 2.5           | 52.14           |
| S1        | <i>Mol006363</i> | 37.54           | 6.83                | 4.1           | 51.54           |
| S1        | <i>Mol006740</i> | 42.75           | 4.58                | 4.2           | 48.47           |
| S2        | <i>Mol018337</i> | 30.71           | 4.56                | 4.15          | 60.58           |
| S2        | <i>Mol020712</i> | 32.34           | 4.26                | 5.11          | 58.3            |
| S2        | <i>Mol013321</i> | 35.62           | 3.86                | 5.58          | 54.94           |
| S2        | <i>OsMYB4</i>    | 35.41           | 4.67                | 5.06          | 54.86           |
| S2        | <i>Mol011069</i> | 35.78           | 5.6                 | 4.74          | 53.88           |
| S2        | <i>Mol015023</i> | 37.96           | 3.67                | 4.9           | 53.47           |
| S2        | <i>Mol018336</i> | 41.45           | 3.63                | 3.63          | 51.3            |
| S3        | <i>Mol010269</i> | 38.87           | 9.43                | 4.53          | 47.17           |
| S3        | <i>Mol001517</i> | 35.79           | 13.11               | 5.74          | 45.36           |
| S3        | <i>Mol010337</i> | 43.45           | 8.61                | 5.62          | 42.32           |
| S4        | <i>Mol003893</i> | 30.25           | 7.56                | 5.88          | 56.3            |
| S4        | <i>Mol008437</i> | 31.34           | 5.07                | 7.37          | 56.22           |
| S4        | <i>Mol008698</i> | 32.06           | 7.25                | 7.25          | 53.44           |
| S4        | <i>Mol019958</i> | 29.72           | 8.96                | 8.49          | 52.83           |
| S4        | <i>Mol009531</i> | 36.7            | 4.59                | 7.34          | 51.38           |
| S4        | <i>Mol004081</i> | 34.66           | 11.16               | 5.18          | 49              |

|     |                  |       |       |       |       |
|-----|------------------|-------|-------|-------|-------|
| S4  | <i>Mol000543</i> | 32.27 | 12.75 | 6.77  | 48.21 |
| S5  | <i>Mol023305</i> | 36.71 | 2.53  | 8.02  | 52.74 |
| S5  | <i>Mol012178</i> | 42.58 | 12.11 | 7.81  | 37.5  |
| S6  | <i>Mol011449</i> | 43.12 | 2.29  | 7.34  | 47.25 |
| S6  | <i>Mol028264</i> | 45.26 | 9.91  | 4.31  | 40.52 |
| S7  | <i>Mol008232</i> | 40.72 | 14.66 | 5.54  | 39.09 |
| S7  | <i>Mol008979</i> | 41.05 | 13.89 | 11.11 | 33.95 |
| S8  | <i>Mol001948</i> | 29.74 | 6.32  | 4.09  | 59.85 |
| S8  | <i>Mol002260</i> | 36.25 | 4.78  | 3.98  | 54.98 |
| S8  | <i>Mol005587</i> | 43.04 | 7.17  | 5.91  | 43.88 |
| S9  | <i>Mol010990</i> | 30.81 | 9.52  | 3.08  | 56.58 |
| S9  | <i>Mol016869</i> | 36.3  | 7.78  | 5.56  | 50.37 |
| S10 | <i>Mol001512</i> | 43.08 | 4.31  | 4.62  | 48    |
| S10 | <i>Mol010343</i> | 39.58 | 12.39 | 3.93  | 44.11 |
| S10 | <i>Mol001350</i> | 42.55 | 11.38 | 5.15  | 40.92 |
| S11 | <i>Mol008800</i> | 33.76 | 6.11  | 4.5   | 55.63 |
| S11 | <i>Mol008801</i> | 41.88 | 4.87  | 5.84  | 47.4  |
| S11 | <i>Mol013646</i> | 35.11 | 7.63  | 11.45 | 45.8  |
| S13 | <i>Mol018126</i> | 24.88 | 4.88  | 4.39  | 65.85 |
| S13 | <i>Mol002856</i> | 29.5  | 6.27  | 5.74  | 58.49 |
| S13 | <i>Mol014116</i> | 35.57 | 6.72  | 8.7   | 49.01 |
| S14 | <i>Mol014101</i> | 33.68 | 8.59  | 3.09  | 54.64 |
| S14 | <i>Mol013852</i> | 35.99 | 6.78  | 3.24  | 53.98 |
| S14 | <i>Mol007569</i> | 34.48 | 7.76  | 3.88  | 53.88 |
| S14 | <i>Mol001134</i> | 31.75 | 11.51 | 5.56  | 51.19 |
| S14 | <i>Mol001734</i> | 39.61 | 6.17  | 4.22  | 50    |

|     |                  |       |       |       |       |
|-----|------------------|-------|-------|-------|-------|
| S14 | <i>Mol000176</i> | 38.83 | 9.39  | 3.24  | 48.54 |
| S14 | <i>Mol019578</i> | 37.19 | 9.12  | 5.26  | 48.42 |
| S14 | <i>Mol004798</i> | 28.62 | 17.39 | 8.7   | 45.29 |
| S17 | <i>Mol019840</i> | 36.96 | 7.83  | 6.52  | 48.7  |
| S17 | <i>Mol026352</i> | 36.94 | 8.28  | 7.64  | 47.13 |
| S17 | <i>Mol023318</i> | 32.52 | 14.63 | 12.2  | 40.65 |
| S17 | <i>Mol021224</i> | 34.43 | 16.39 | 10.16 | 39.02 |
| S17 | <i>Mol023319</i> | 44.32 | 10.98 | 6.82  | 37.88 |
| S17 | <i>Mol023320</i> | 46.05 | 8.37  | 7.91  | 37.67 |
| S17 | <i>Mol006174</i> | 50.89 | 7.14  | 5.36  | 36.61 |
| S17 | <i>Mol017655</i> | 44.95 | 13.76 | 8.72  | 32.57 |
| S18 | <i>Mol017152</i> | 22.74 | 6.32  | 3.79  | 67.15 |
| S18 | <i>AtMYB33</i>   | 25.38 | 4.81  | 3.65  | 66.15 |
| S18 | <i>Mol014836</i> | 28.31 | 5.03  | 2.05  | 64.62 |
| S18 | <i>AtMYB101</i>  | 28.16 | 4.9   | 4.69  | 62.24 |
| S18 | <i>Mol016758</i> | 26.25 | 9.34  | 3.54  | 60.87 |
| S18 | <i>Mol012137</i> | 38.4  | 3.99  | 4.49  | 53.12 |
| S18 | <i>Mol006579</i> | 33.6  | 7.8   | 5.65  | 52.96 |
| S18 | <i>Mol012133</i> | 45.08 | 9.84  | 8.2   | 36.89 |
| S19 | <i>Mol012057</i> | 38    | 4.5   | 4.5   | 53    |
| S19 | <i>Mol010957</i> | 31.53 | 12.32 | 4.93  | 51.23 |
| S20 | <i>AtMYB2</i>    | 32.97 | 9.52  | 2.93  | 54.58 |
| S20 | <i>Mol007990</i> | 34.66 | 6.86  | 3.97  | 54.51 |
| S20 | <i>TaPIMP1</i>   | 46.13 | 3.1   | 4.02  | 46.75 |
| S20 | <i>Mol002558</i> | 43.48 | 5.53  | 5.93  | 45.06 |
| S20 | <i>Mol015419</i> | 39.05 | 10.48 | 10    | 40.48 |

|     |                  |       |       |       |       |
|-----|------------------|-------|-------|-------|-------|
| S20 | <i>OsMYB2</i>    | 49.67 | 9.67  | 4.67  | 36    |
| S21 | <i>Mol014848</i> | 22.72 | 11.24 | 7.49  | 58.55 |
| S21 | <i>Mol009191</i> | 31.31 | 8.63  | 5.43  | 54.63 |
| S21 | <i>Mol023861</i> | 35.15 | 5.86  | 4.6   | 54.39 |
| S21 | <i>Mol011788</i> | 31.78 | 9.75  | 4.66  | 53.81 |
| S21 | <i>Mol000510</i> | 32.19 | 11.16 | 4.29  | 52.36 |
| S21 | <i>Mol003679</i> | 35.8  | 8.64  | 6.17  | 49.38 |
| S21 | <i>Mol015625</i> | 41.78 | 4.89  | 4.44  | 48.89 |
| S21 | <i>Mol022732</i> | 37.3  | 13.18 | 4.5   | 45.02 |
| S21 | <i>Mol018713</i> | 38.59 | 12.86 | 4.15  | 44.4  |
| S21 | <i>Mol001669</i> | 39.88 | 11.35 | 5.52  | 43.25 |
| S21 | <i>Mol028471</i> | 42.74 | 10.26 | 8.97  | 38.03 |
| S21 | <i>Mol006728</i> | 38.67 | 16.67 | 11.33 | 33.33 |
| S22 | <i>Mol021537</i> | 26.07 | 7.26  | 3.63  | 63.04 |
| S22 | <i>AtMYB44</i>   | 21.97 | 10.82 | 4.92  | 62.3  |
| S22 | <i>TaMYB70</i>   | 23.95 | 9.28  | 5.69  | 61.08 |
| S22 | <i>Mol013522</i> | 32.76 | 6.21  | 3.79  | 57.24 |
| S22 | <i>Mol028701</i> | 35.66 | 5.81  | 3.1   | 55.43 |
| S22 | <i>Mol017415</i> | 30.99 | 10.74 | 6.2   | 52.07 |
| S22 | <i>Mol009335</i> | 49.59 | 8.13  | 7.32  | 34.96 |
| S23 | <i>Mol016109</i> | 23.94 | 6.91  | 3.72  | 65.43 |
| S24 | <i>Mol003923</i> | 33.45 | 3.45  | 4.48  | 58.62 |
| S25 | <i>Mol011587</i> | 39.85 | 6.94  | 3.34  | 49.87 |
| S25 | <i>Mol001031</i> | 41.91 | 9.25  | 2.89  | 45.95 |
|     | <i>Mol002877</i> | 28.25 | 4.44  | 3.81  | 63.49 |
|     | <i>Mol013317</i> | 27.24 | 6.81  | 4.95  | 60.99 |

|                  |       |       |      |       |
|------------------|-------|-------|------|-------|
| <i>Mol000639</i> | 24.07 | 11.11 | 6.67 | 58.15 |
| <i>Mol011408</i> | 29.78 | 6.25  | 5.88 | 58.09 |
| <i>Mol020055</i> | 29.23 | 8.62  | 5.23 | 56.92 |
| <i>Mol017976</i> | 34.7  | 4.1   | 5.05 | 56.15 |
| <i>Mol004182</i> | 31.01 | 8.54  | 5.06 | 55.38 |
| <i>Mol017683</i> | 34.65 | 8.84  | 5.12 | 51.4  |
| <i>Mol012110</i> | 36.24 | 6.38  | 6.38 | 51.01 |
| <i>Mol006542</i> | 31.07 | 11    | 7.12 | 50.81 |
| <i>Mol016709</i> | 37.98 | 6.59  | 9.69 | 45.74 |
| <i>Mol005657</i> | 43.64 | 4.81  | 5.84 | 45.7  |
| <i>Mol016137</i> | 39    | 9.96  | 6.22 | 44.81 |
| <i>Mol011807</i> | 57.05 | 8.72  | 3.36 | 30.87 |

**TABLE S4a.** Putative *cis*-acting elements identified in the promoter regions of *CsMYB* genes

|                  | Cis-acting elements | Number | Function                                                          |
|------------------|---------------------|--------|-------------------------------------------------------------------|
| Light responsive | 3-AF1 binding site  | 7      | light responsive element                                          |
|                  | ACE                 | 10     | cis-acting element involved in light responsiveness               |
|                  | AE-box              | 26     | part of a module for light response                               |
|                  | AT1-motif           | 12     | part of a light responsive module                                 |
|                  | ATCT-motif          | 30     | part of a conserved DNA module involved in light responsiveness   |
|                  | Box 4               | 441    | part of a conserved DNA module involved in light responsiveness   |
|                  | chs-CMA1a           | 22     | part of a light responsive element                                |
|                  | chs-CMA2a           | 9      | part of a light responsive element                                |
|                  | GA-motif            | 30     | part of a light responsive element                                |
|                  | Gap-box             | 10     | part of a light responsive element                                |
|                  | GATA-motif          | 72     | part of a light responsive element                                |
|                  | G-box               | 176    | cis-acting regulatory element involved in light responsiveness    |
|                  | GT1-motif           | 102    | light responsive element                                          |
|                  | I-box               | 35     | part of a light responsive element                                |
|                  | LAMP-element        | 16     | part of a light responsive element                                |
|                  | MRE                 | 40     | MYB binding site involved in light responsiveness                 |
|                  | Sp1                 | 23     | light responsive element                                          |
|                  | TCCC-motif          | 41     | part of a light responsive element                                |
|                  | TCT-motif           | 91     | part of a light responsive element                                |
| Hormone          | ABRE                | 151    | cis-acting element involved in the abscisic acid responsiveness   |
|                  | AuxRR-core          | 13     | cis-acting regulatory element involved in auxin responsiveness    |
|                  | CGTCA-motif         | 151    | cis-acting regulatory element involved in the MeJA-responsiveness |
|                  | GARE-motif          | 14     | gibberellin-responsive element                                    |



|                       |                 |     |                                                                      |
|-----------------------|-----------------|-----|----------------------------------------------------------------------|
|                       | P-box           | 19  | gibberellin-responsive element                                       |
|                       | TATC-box        | 20  | cis-acting element involved in gibberellin-responsiveness            |
|                       | TCA-element     | 58  | cis-acting element involved in salicylic acid responsiveness         |
|                       | TGACG-motif     | 151 | cis-acting regulatory element involved in the MeJA-responsiveness    |
|                       | TGA-element     | 31  | auxin-responsive element                                             |
| Abiotic/biotic stress | ARE             | 163 | cis-acting regulatory element essential for the anaerobic induction  |
|                       | GC-motif        | 7   | enhancer-like element involved in anoxic specific inducibility       |
|                       | LTR             | 39  | cis-acting element involved in low-temperature responsiveness        |
|                       | MBS             | 48  | MYB binding site involved in drought-inducibility                    |
|                       | TC-rich repeats | 40  | cis-acting element involved in defense and stress responsiveness     |
| Development           | CAT-box         | 52  | cis-acting regulatory element related to meristem expression         |
|                       | circadian       | 31  | cis-acting regulatory element involved in circadian control          |
|                       | GCN4_motif      | 23  | cis-regulatory element involved in endosperm expression              |
|                       | O2-site         | 49  | cis-acting regulatory element involved in zein metabolism regulation |
|                       | RY-element      | 12  | cis-acting regulatory element involved in seed-specific regulation   |

**TABLE S4b.** The number (No.) of MBS elements in *CsMYBs* and 11 *DsMYBs*.

| Subgroups | Gene ID          | No. of MBS elements | Subgroups | Gene ID          | No. of MBS elements |
|-----------|------------------|---------------------|-----------|------------------|---------------------|
| S1        | <i>OsMYB60</i>   | 1                   | S14       | <i>Mol019578</i> | 1                   |
| S1        | <i>AtMYB96</i>   | 1                   | S14       | <i>Mol000176</i> |                     |
| S1        | <i>Mol006740</i> |                     | S14       | <i>Mol004798</i> |                     |
| S1        | <i>AtMYB60</i>   |                     | S14       | <i>Mol014101</i> |                     |
| S1        | <i>Mol006363</i> |                     | S14       | <i>Mol013852</i> |                     |
| S1        | <i>Mol018189</i> |                     | S14       | <i>Mol001734</i> |                     |
| S1        | <i>Mol017692</i> |                     | S14       | <i>Mol007569</i> |                     |
| S1        | <i>Mol005176</i> |                     | S14       | <i>Mol001134</i> |                     |
| S2        | <i>Mol015023</i> | 1                   | S17       | <i>Mol006174</i> | 1                   |
| S2        | <i>Mol011069</i> |                     | S17       | <i>Mol021224</i> | 1                   |
| S2        | <i>Mol013321</i> |                     | S17       | <i>Mol023318</i> |                     |
| S2        | <i>Mol018337</i> |                     | S17       | <i>Mol023320</i> |                     |
| S2        | <i>Mol018336</i> |                     | S17       | <i>Mol023319</i> |                     |
| S2        | <i>Mol020712</i> |                     | S17       | <i>Mol017655</i> |                     |
| S2        | <i>OsMYB4</i>    |                     | S17       | <i>Mol026352</i> |                     |
| S3        | <i>Mol001517</i> |                     | S17       | <i>Mol019840</i> |                     |
| S3        | <i>Mol010269</i> |                     | S18       | <i>AtMYB101</i>  | 1                   |
| S3        | <i>Mol010337</i> |                     | S18       | <i>Mol017152</i> | 1                   |
| S4        | <i>Mol003893</i> | 2                   | S18       | <i>Mol016758</i> | 1                   |
| S4        | <i>Mol008437</i> | 2                   | S18       | <i>Mol014836</i> | 1                   |
| S4        | <i>Mol000543</i> | 2                   | S18       | <i>Mol012137</i> |                     |
| S4        | <i>Mol004081</i> | 1                   | S18       | <i>Mol012133</i> |                     |
| S4        | <i>Mol008698</i> |                     | S18       | <i>Mol006579</i> |                     |
| S4        | <i>Mol009531</i> |                     | S18       | <i>AtMYB33</i>   |                     |
| S4        | <i>Mol019958</i> |                     | S19       | <i>Mol010957</i> |                     |
| S5        | <i>Mol012178</i> | 1                   | S19       | <i>Mol012057</i> |                     |
| S5        | <i>Mol023305</i> |                     | S20       | <i>Mol015419</i> | 3                   |
| S6        | <i>Mol011449</i> | 2                   | S20       | <i>AtMYB2</i>    | 1                   |
| S6        | <i>Mol028264</i> |                     | S20       | <i>TaPIMP1</i>   | 1                   |
| S7        | <i>Mol008232</i> | 2                   | S20       | <i>OsMYB2</i>    | 1                   |
| S7        | <i>Mol008979</i> |                     | S20       | <i>Mol002558</i> |                     |
| S8        | <i>Mol001948</i> | 1                   | S20       | <i>Mol007990</i> |                     |
| S8        | <i>Mol002260</i> | 1                   | S21       | <i>Mol006728</i> | 1                   |
| S8        | <i>Mol005587</i> |                     | S21       | <i>Mol028471</i> | 1                   |
| S9        | <i>Mol010990</i> |                     | S21       | <i>Mol001669</i> | 1                   |
| S9        | <i>Mol016869</i> |                     | S21       | <i>Mol011788</i> | 1                   |
| S10       | <i>Mol001512</i> |                     | S21       | <i>Mol000510</i> | 1                   |
| S10       | <i>Mol010343</i> |                     | S21       | <i>Mol018713</i> | 1                   |
| S10       | <i>Mol001350</i> |                     | S21       | <i>Mol003679</i> |                     |
| S11       | <i>Mol008800</i> | 2                   | S21       | <i>Mol014848</i> |                     |

|     |                  |   |
|-----|------------------|---|
| S11 | <i>Mol008801</i> | 1 |
| S11 | <i>Mol013646</i> |   |
| S13 | <i>Mol002856</i> |   |
| S13 | <i>Mol018126</i> |   |
| S13 | <i>Mol014116</i> |   |
| S10 | <i>Mol001512</i> |   |
| S10 | <i>Mol010343</i> |   |
| S10 | <i>Mol001350</i> |   |
| S11 | <i>Mol008800</i> | 2 |
| S11 | <i>Mol008801</i> | 1 |
| S11 | <i>Mol013646</i> |   |
| S13 | <i>Mol002856</i> |   |
| S13 | <i>Mol018126</i> |   |
| S13 | <i>Mol014116</i> |   |
| S10 | <i>Mol001512</i> |   |
| S10 | <i>Mol010343</i> |   |
| S10 | <i>Mol001350</i> |   |
| S11 | <i>Mol008800</i> | 2 |
| S11 | <i>Mol008801</i> | 1 |
| S11 | <i>Mol013646</i> |   |
| S13 | <i>Mol002856</i> |   |
| S13 | <i>Mol018126</i> |   |
| S13 | <i>Mol014116</i> |   |
|     | <i>Mol005657</i> |   |
|     | <i>Mol012110</i> |   |
|     | <i>Mol011408</i> |   |
| S21 | <i>Mol022732</i> |   |
| S21 | <i>Mol009191</i> |   |
| S21 | <i>Mol015625</i> |   |
| S21 | <i>Mol023861</i> |   |
| S22 | <i>TaMYB70</i>   | 2 |
| S22 | <i>Mol017415</i> | 2 |
| S22 | <i>Mol009335</i> | 2 |
| S22 | <i>Mol021537</i> | 1 |
| S22 | <i>AtMYB44</i>   | 1 |
| S22 | <i>Mol028701</i> |   |
| S22 | <i>Mol013522</i> |   |
| S23 | <i>Mol016109</i> | 1 |
| S24 | <i>Mol003923</i> |   |
| S25 | <i>Mol001031</i> | 1 |
| S25 | <i>Mol011587</i> |   |
|     | <i>Mol006542</i> | 3 |
|     | <i>Mol002877</i> | 2 |
|     | <i>Mol000639</i> | 1 |
|     | <i>Mol011807</i> | 1 |
|     | <i>Mol016137</i> | 1 |
|     | <i>Mol017976</i> |   |
|     | <i>Mol004182</i> |   |
|     | <i>Mol020055</i> |   |
|     | <i>Mol016709</i> |   |
|     | <i>Mol017683</i> |   |
|     | <i>Mol013317</i> |   |

**TABLE S5a.** Expression profiles of *CsMYB* genes in leaves

| Genes            | L1     | L2     | L3    |
|------------------|--------|--------|-------|
| <i>Mol009531</i> | 150.12 | 149.09 | 86.66 |
| <i>Mol008698</i> | 86.98  | 199.03 | 95.21 |
| <i>Mol001948</i> | 69.57  | 153.43 | 11.58 |
| <i>Mol002260</i> | 67.15  | 287.74 | 7.18  |
| <i>Mol019958</i> | 54.06  | 56.99  | 16    |
| <i>Mol018189</i> | 43.79  | 14.21  | 38.25 |
| <i>Mol020055</i> | 43.34  | 95.69  | 0.97  |
| <i>Mol005176</i> | 42.44  | 64.78  | 36.82 |
| <i>Mol021537</i> | 32.64  | 91.16  | 72.31 |
| <i>Mol018713</i> | 29.75  | 39.38  | 0.25  |
| <i>Mol006579</i> | 28.57  | 26.32  | 22.59 |
| <i>Mol001517</i> | 24.85  | 87.73  | 0.39  |
| <i>Mol021224</i> | 21.33  | 21.15  | 37.37 |
| <i>Mol017415</i> | 16.97  | 8.86   | 5.5   |
| <i>Mol017655</i> | 16.48  | 58.32  | 70.31 |
| <i>Mol010269</i> | 15.67  | 100.92 | 4.6   |
| <i>Mol004182</i> | 13.31  | 14.47  | 0.09  |
| <i>Mol011788</i> | 11.97  | 20.69  | 5.33  |
| <i>Mol016109</i> | 10.75  | 13.54  | 11.94 |
| <i>Mol003893</i> | 10.55  | 12.86  | 9.82  |
| <i>Mol004081</i> | 10.26  | 10.27  | 2.03  |
| <i>Mol007990</i> | 9.34   | 60.4   | 57.12 |
| <i>Mol008437</i> | 8.31   | 14.41  | 4.56  |
| <i>Mol002856</i> | 7.92   | 2.56   | 3.17  |
| <i>Mol007569</i> | 7.39   | 7.23   | 3.55  |
| <i>Mol016869</i> | 6.94   | 2.08   | 10.65 |
| <i>Mol026352</i> | 5.51   | 10.45  | 3.63  |
| <i>Mol000176</i> | 4.39   | 31.66  | 5.16  |
| <i>Mol016709</i> | 2.72   | 7.86   | 1.74  |
| <i>Mol010337</i> | 1.81   | 10.42  | 0.44  |
| <i>Mol015419</i> | 1.52   | 89.42  | 57.79 |
| <i>Mol011408</i> | 1.11   | 10.41  | 5.66  |
| <i>Mol004798</i> | 0.22   | 9.59   | 2.64  |
| <i>Mol011449</i> | 0.15   | 5.15   | 0     |
| <i>Mol015023</i> | 0      | 5.9    | 3.7   |

**TABLE S5b.** Expression profiles of *CsMYB* genes in roots

| Genes            | R1     | R2     | R3     |
|------------------|--------|--------|--------|
| <i>Mol001948</i> | 146.64 | 1.74   | 3.12   |
| <i>Mol008698</i> | 144.73 | 63.48  | 28.87  |
| <i>Mol015419</i> | 118.33 | 42.14  | 7.82   |
| <i>Mol007990</i> | 94.86  | 26.08  | 8.38   |
| <i>Mol003923</i> | 91.85  | 44.66  | 24.89  |
| <i>Mol001517</i> | 86.75  | 9.61   | 7.51   |
| <i>Mol009531</i> | 80.04  | 38.69  | 16.39  |
| <i>Mol019840</i> | 68.84  | 38.74  | 11.72  |
| <i>Mol006174</i> | 66.79  | 120.33 | 4.01   |
| <i>Mol002856</i> | 58.53  | 29.27  | 9.72   |
| <i>Mol021537</i> | 51.7   | 134.36 | 787.3  |
| <i>Mol010269</i> | 51.23  | 41.04  | 9.06   |
| <i>Mol013852</i> | 45.72  | 8.95   | 5.4    |
| <i>Mol023318</i> | 38.09  | 64.81  | 3.39   |
| <i>Mol011788</i> | 36.9   | 5.4    | 5.29   |
| <i>Mol002260</i> | 35.33  | 22.27  | 11.93  |
| <i>Mol004081</i> | 35.33  | 18.87  | 9.29   |
| <i>Mol026352</i> | 35.31  | 22.63  | 1.1    |
| <i>Mol020055</i> | 35.29  | 0      | 0      |
| <i>Mol017655</i> | 32.04  | 3.13   | 7.29   |
| <i>Mol006579</i> | 31.25  | 83.86  | 125.33 |
| <i>Mol019958</i> | 30.19  | 54.59  | 25.29  |
| <i>Mol003893</i> | 30.02  | 101.56 | 112.83 |
| <i>Mol021224</i> | 27.47  | 48.53  | 44.98  |
| <i>Mol005176</i> | 26.68  | 28.25  | 25.01  |
| <i>Mol011408</i> | 25.71  | 6.29   | 7.42   |
| <i>Mol008437</i> | 25.2   | 5.71   | 5.09   |
| <i>Mol004798</i> | 21.12  | 5.2    | 3.13   |
| <i>Mol001734</i> | 18.92  | 4.35   | 1.98   |
| <i>Mol017976</i> | 15.68  | 4.59   | 7.64   |
| <i>Mol016869</i> | 14.91  | 16.15  | 18.54  |
| <i>Mol019578</i> | 14.43  | 62.68  | 35.12  |
| <i>Mol000176</i> | 13.74  | 3.15   | 1.57   |
| <i>Mol016109</i> | 13.28  | 25.57  | 19.75  |
| <i>Mol014101</i> | 13.2   | 18.11  | 9.17   |
| <i>Mol018713</i> | 10.21  | 1.06   | 1.85   |
| <i>Mol016709</i> | 9.91   | 1.22   | 3.04   |
| <i>Mol007569</i> | 9.85   | 39.58  | 32.44  |
| <i>Mol001512</i> | 9.66   | 1.95   | 1.95   |
| <i>Mol010337</i> | 9.16   | 0.94   | 1.63   |
| <i>Mol000639</i> | 6.57   | 0.23   | 0.69   |
| <i>Mol015023</i> | 5.8    | 0.39   | 0.26   |

|                  |      |      |       |
|------------------|------|------|-------|
| <i>Mol010343</i> | 4.29 | 5.19 | 3.45  |
| <i>Mol018189</i> | 3.54 | 5.61 | 12.65 |
| <i>Mol008801</i> | 2.92 | 8.41 | 9.67  |
| <i>Mol013522</i> | 2.81 | 7.42 | 15.57 |
| <i>Mol023320</i> | 1.86 | 7.39 | 0.75  |
| <i>Mol011807</i> | 1.25 | 3.43 | 5.93  |
| <i>Mol010990</i> | 0.85 | 8.94 | 4.17  |

---

**TABLE S6a.** The fold-changes of *CsMYB* genes in leaves of *C. sinense* under drought stress treatment

| Subfamilies | Gene ID          | Fold change of L2 | Regulation | Fold change of L3 | Regulation |
|-------------|------------------|-------------------|------------|-------------------|------------|
| S21         | <i>Mol011788</i> | 1.728487886       |            | 0.445279866       | down       |
| S21         | <i>Mol018713</i> | 1.323697479       |            | 0.008403361       | down       |
| S22         | <i>Mol021537</i> | 2.792892157       | up         | 2.215379902       | up         |
| S22         | <i>Mol017415</i> | 0.52209782        |            | 0.324101355       | down       |
| S23         | <i>Mol016109</i> | 1.259534884       |            | 1.110697674       |            |
| S18         | <i>Mol006579</i> | 0.921246062       |            | 0.790689534       |            |
| S17         | <i>Mol017655</i> | 3.538834951       | up         | 4.266383495       | up         |
| S17         | <i>Mol021224</i> | 0.991561181       |            | 1.751992499       |            |
| S17         | <i>Mol026352</i> | 1.896551724       |            | 0.658802178       |            |
| S20         | <i>Mol015419</i> | 58.82894737       | up         | 38.01973684       | up         |
| S20         | <i>Mol007990</i> | 6.466809422       | up         | 6.115631692       | up         |
| S13         | <i>Mol002856</i> | 0.323232323       | down       | 0.400252525       | down       |
|             | <i>Mol004182</i> | 1.087152517       |            | 0.006761833       | down       |
| S16         | <i>Mol011449</i> | 34.33333333       | up         | 0                 |            |
|             | <i>Mol020055</i> | 2.207891094       | up         | 0.022381172       | down       |
| S8          | <i>Mol001948</i> | 2.205404628       | up         | 0.166451056       | down       |
| S8          | <i>Mol002260</i> | 4.285033507       | up         | 0.106924795       | down       |
| S4          | <i>Mol008698</i> | 2.288227179       | up         | 1.094619453       |            |
| S4          | <i>Mol004081</i> | 1.000974659       |            | 0.197855575       | down       |
| S4          | <i>Mol009531</i> | 0.993138822       |            | 0.577271516       |            |
| S4          | <i>Mol019958</i> | 1.054199038       |            | 0.295967444       | down       |
| S4          | <i>Mol003893</i> | 1.218957346       |            | 0.930805687       |            |
| S4          | <i>Mol008437</i> | 1.734055355       |            | 0.548736462       |            |
| S9          | <i>Mol016869</i> | 0.299711816       | down       | 1.534582133       |            |

|     |                  |             |      |             |      |
|-----|------------------|-------------|------|-------------|------|
|     | <i>Mol011408</i> | 9.378378378 | up   | 5.099099099 | up   |
|     | <i>Mol016709</i> | 2.889705882 | up   | 0.639705882 |      |
| S14 | <i>Mol000176</i> | 7.211845103 | up   | 1.175398633 |      |
| S14 | <i>Mol004798</i> | 43.59090909 | up   | 12          | up   |
| S14 | <i>Mol007569</i> | 0.97834912  |      | 0.48037889  | down |
| S1  | <i>Mol018189</i> | 0.324503311 | down | 0.873487098 |      |
| S1  | <i>Mol005176</i> | 1.526390198 |      | 0.867577757 |      |
| S3  | <i>Mol010337</i> | 5.756906077 | up   | 0.243093923 | down |
| S3  | <i>Mol001517</i> | 3.530382294 | up   | 0.015694165 | down |
| S3  | <i>Mol010269</i> | 6.440331844 | up   | 0.293554563 | down |
| S2  | <i>Mol015023</i> | NaN         |      | NaN         |      |

---



**TABLE S6b.** The fold-changes of *CsMYB* genes in roots of *C. sinense* under drought stress treatment

| Subfamilies | Gene ID          | R2/R1       | Regulation | R3/R1       | Regulation |
|-------------|------------------|-------------|------------|-------------|------------|
| S21         | <i>Mol011788</i> | 0.146341463 | down       | 0.143360434 | down       |
| S21         | <i>Mol018713</i> | 0.103819785 | down       | 0.181194907 | down       |
| S22         | <i>Mol013522</i> | 2.640569395 | up         | 5.540925267 | up         |
| S22         | <i>Mol021537</i> | 2.598839458 | up         | 15.22823985 | up         |
| S23         | <i>Mol016109</i> | 1.925451807 |            | 1.487198795 |            |
|             | <i>Mol011807</i> | 2.744       | up         | 4.744       | up         |
| S18         | <i>Mol006579</i> | 2.68352     | up         | 4.01056     | up         |
| S17         | <i>Mol023320</i> | 3.97311828  | up         | 0.403225806 | down       |
| S17         | <i>Mol006174</i> | 1.801617009 |            | 0.060038928 | down       |
| S17         | <i>Mol023318</i> | 1.701496456 |            | 0.088999737 | down       |
| S17         | <i>Mol017655</i> | 0.097690387 | down       | 0.22752809  | down       |
| S17         | <i>Mol021224</i> | 1.766654532 |            | 1.637422643 |            |
| S17         | <i>Mol026352</i> | 0.640894931 |            | 0.031152648 | down       |
| S17         | <i>Mol019840</i> | 0.562754213 |            | 0.170249855 | down       |
| S20         | <i>Mol015419</i> | 0.356122708 | down       | 0.066086369 | down       |
| S20         | <i>Mol007990</i> | 0.274931478 | down       | 0.088340713 | down       |
| S16         | <i>Mol002856</i> | 0.500085426 |            | 0.166068683 | down       |
|             | <i>Mol017976</i> | 0.292729592 | down       | 0.487244898 | down       |
|             | <i>Mol020055</i> | 0           |            | 0           |            |
| S8          | <i>Mol001948</i> | 0.011865794 | down       | 0.021276596 | down       |
| S8          | <i>Mol002260</i> | 0.630342485 |            | 0.337673365 | down       |
| S4          | <i>Mol008698</i> | 0.438609825 | down       | 0.199474884 | down       |
| S4          | <i>Mol004081</i> | 0.534106991 |            | 0.262949335 | down       |
| S4          | <i>Mol009531</i> | 0.483383308 | down       | 0.204772614 | down       |

|     |                  |             |      |             |      |
|-----|------------------|-------------|------|-------------|------|
| S4  | <i>Mol019958</i> | 1.808214641 |      | 0.837694601 |      |
| S4  | <i>Mol003893</i> | 3.383077948 | up   | 3.758494337 | up   |
| S4  | <i>Mol008437</i> | 0.226587302 | down | 0.201984127 | down |
| S11 | <i>Mol008801</i> | 2.880136986 | up   | 3.311643836 | up   |
| S9  | <i>Mol016869</i> | 1.083165661 |      | 1.243460765 |      |
| S9  | <i>Mol010990</i> | 10.51764706 | up   | 4.905882353 | up   |
| S10 | <i>Mol010343</i> | 1.20979021  |      | 0.804195804 |      |
| S10 | <i>Mol001512</i> | 0.201863354 | down | 0.201863354 | down |
| S24 | <i>Mol003923</i> | 0.486227545 | down | 0.270985302 | down |
| S14 | <i>Mol011408</i> | 0.244651886 | down | 0.288603656 | down |
| S14 | <i>Mol016709</i> | 0.123107972 | down | 0.306760848 | down |
| S14 | <i>Mol000639</i> | 0.03500761  | down | 0.105022831 | down |
| S14 | <i>Mol019578</i> | 4.343728344 | up   | 2.433818434 | up   |
| S14 | <i>Mol000176</i> | 0.229257642 | down | 0.11426492  | down |
| S14 | <i>Mol013852</i> | 0.19575678  | down | 0.118110236 | down |
| S14 | <i>Mol001734</i> | 0.229915433 | down | 0.104651163 | down |
| S14 | <i>Mol004798</i> | 0.246212121 | down | 0.148200758 | down |
| S14 | <i>Mol014101</i> | 1.371969697 |      | 0.69469697  |      |
| S14 | <i>Mol007569</i> | 4.018274112 | up   | 3.293401015 | up   |
| S1  | <i>Mol018189</i> | 1.584745763 |      | 3.573446328 | up   |
| S1  | <i>Mol005176</i> | 1.058845577 |      | 0.937406297 |      |
| S3  | <i>Mol010337</i> | 0.102620087 | down | 0.177947598 | down |
| S3  | <i>Mol001517</i> | 0.110778098 | down | 0.086570605 | down |
| S3  | <i>Mol010269</i> | 0.80109311  |      | 0.176849502 | down |
| S2  | <i>Mol015023</i> | 0.067241379 | down | 0.044827586 | down |

---

**TABLE S7.** The primers of *CsMYB* genes.

| Gene ID          | Primer name | Sequence               |
|------------------|-------------|------------------------|
| <i>Mol021537</i> | 37-F        | TCTAGCTCTACCAACCAAACCG |
|                  | 37-R        | TCCCGCTCAGATAATTCCTCA  |
| <i>Mol018189</i> | 89-F        | ACAGTCG TTCACCATCGTCG  |
|                  | 89-R        | TAGGCGGTTTCCTCATCCA    |
| <i>Mol015419</i> | 19-F        | GGAAACCGCTGGTCAAAGA    |
|                  | 19-R        | GGACGATGAGAACCCATTACG  |
| <i>Mol002260</i> | 60-F        | TTGTTGTTGGCGGGCAGTA    |
|                  | 60-R        | TCGGGGCGAAGATAGTTTGT   |
| <i>Mol018713</i> | 13-F        | ATTCCTGGTCGCACAGATAAC  |
|                  | 13-R        | AAACTGCCTTGCTTCCCTTG   |
| <i>Mol001948</i> | 48-F        | CAGGCTGAGATGGACGAACTAT |
|                  | 48-R        | CGGTTCTTCCAGGGAGGTTT   |
| <i>Mol008698</i> | 98-F        | CTCGGCAACAAATGGTCGT    |
|                  | 98-R        | GCTGCTCTTGTTTCTTTCGTCT |
| <i>Mol000176</i> | 76-F        | GGCTCCGATGGCTGAACTAT   |
|                  | 76-R        | TGATCTTTGCGGGATTTGC    |
| <i>Mol010269</i> | 69-F        | AATAAGGGCTCATGGACGGT   |
|                  | 69-R        | CGACAACCTTCCCACAACG    |
| <i>Mol022529</i> | ACT-F       | TGGCATCACACCTTCTACAAC  |
|                  | ACT-R       | CATAGCAGGCACATTGAAAGTC |

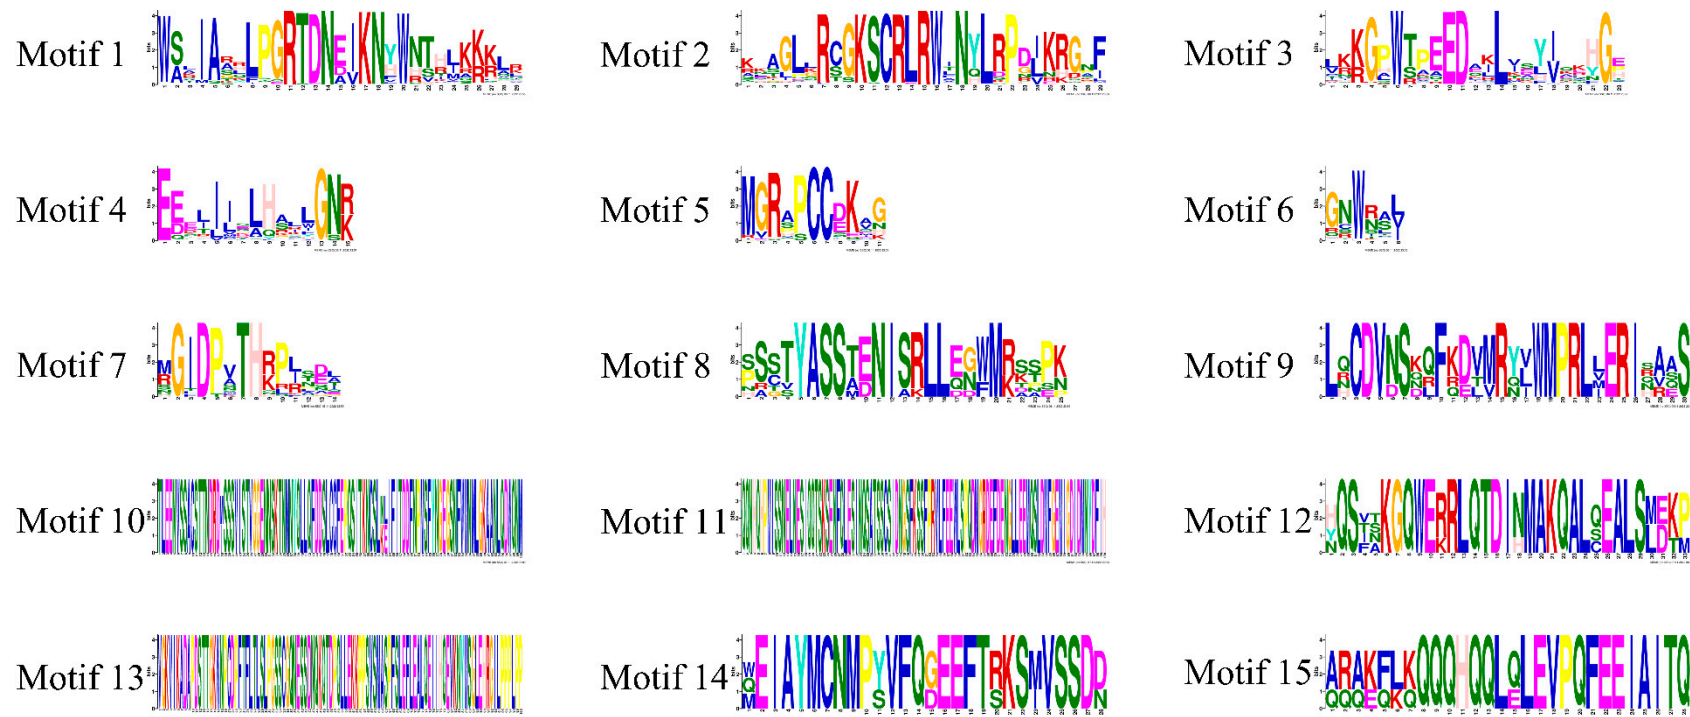

**FIGURE S1.** The 15 motifs of *CsMYBs* and *DrMYBs*

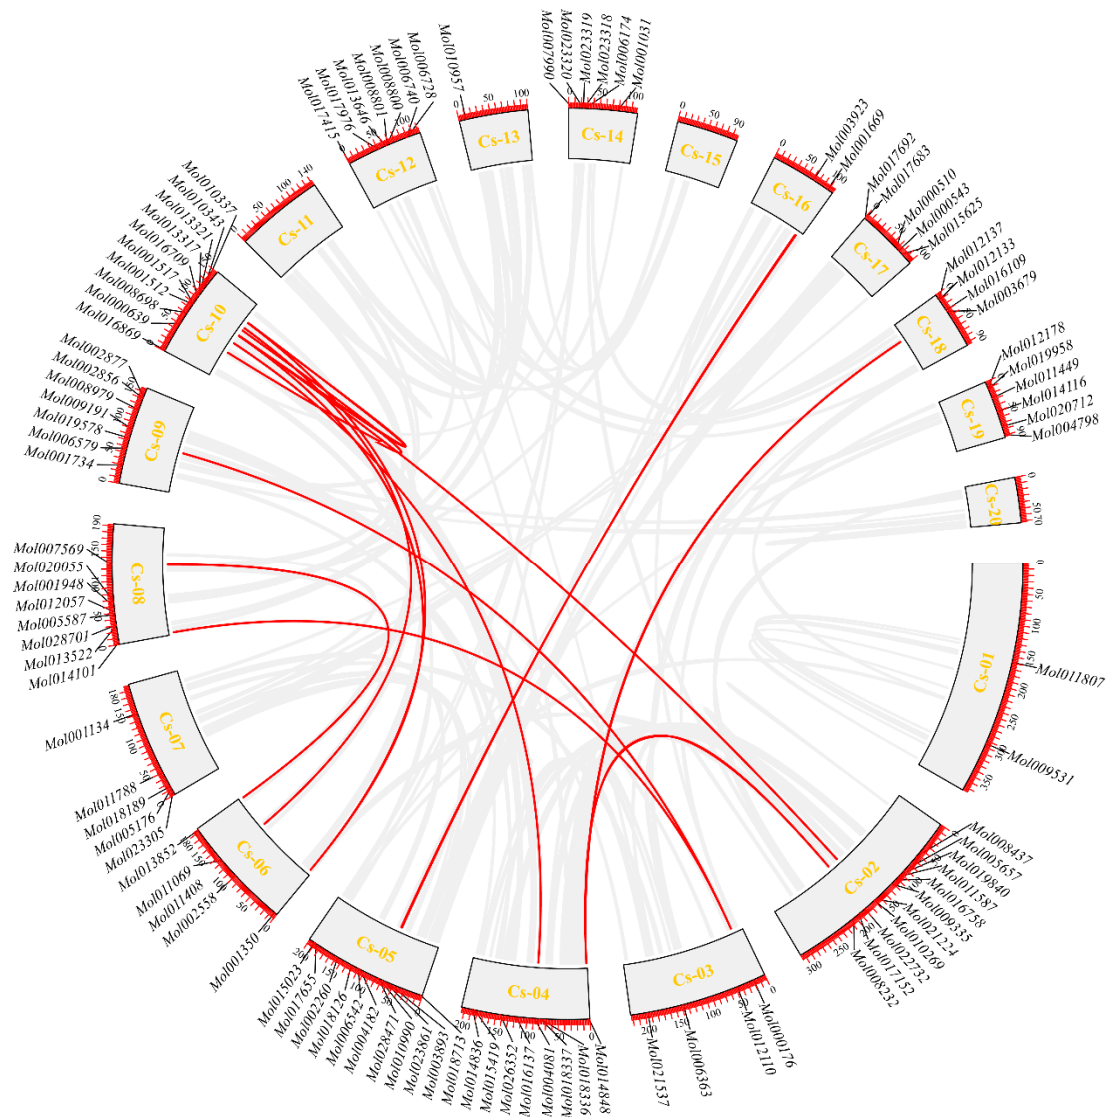

**FIGURE S2.** The collinearity of *CsMYB* genes in *C. sinensis*. The gray line in the background indicates collinear blocks within species, while the red lines highlight the syntenic R2R3-MYB gene pairs.

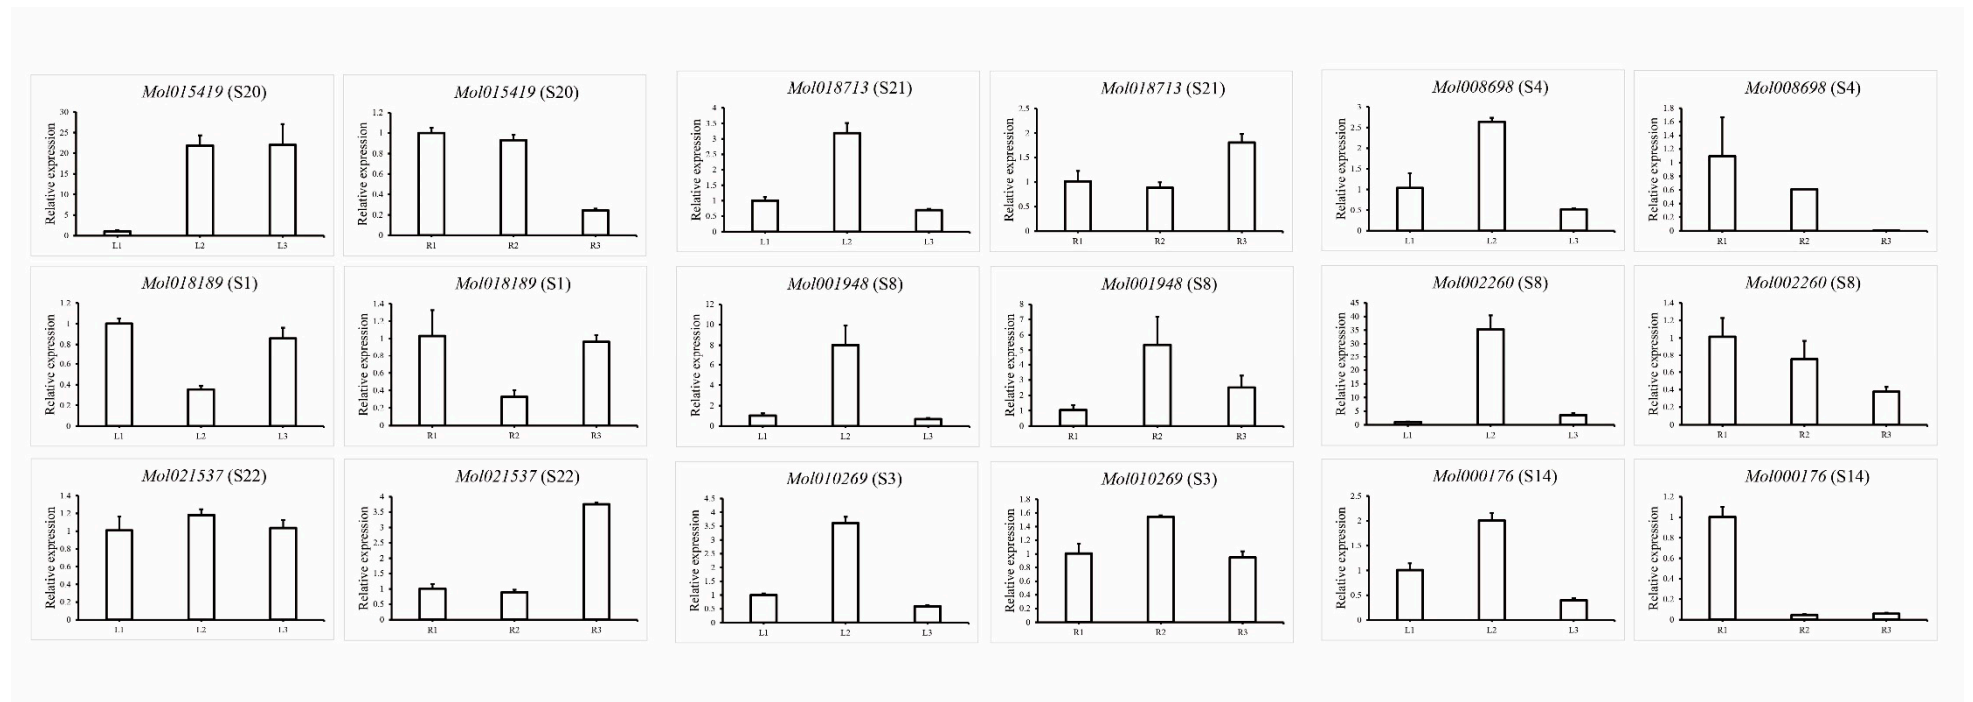

**Figure S3.** RT-qPCR validation of transcriptomic data of nine *CsMYB* genes under drought stress.

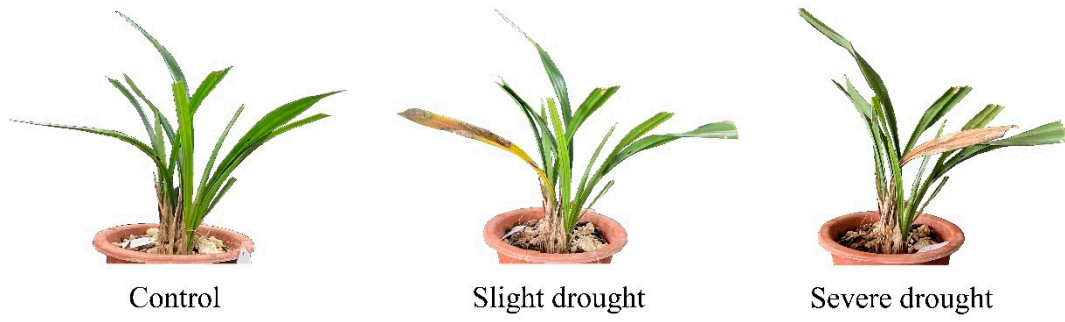

**FIGURE S4.** The plant of *C. sinense* under three treatments.
